1 **Perceptual decisions about object shape bias visuomotor coordination during**  
2 **rapid reaching and interception**

3  
4 Deborah A. Barany, Ana Gómez-Granados, Margaret Schraye, Sarah A. Cutts, Tarkeshwar  
5 Singh

6  
7 Department of Kinesiology  
8 University of Georgia, Athens, GA

9  
10  
11  
12 **Corresponding author:**

13 Tarkeshwar Singh  
14 Department of Kinesiology  
15 330 River Rd, 115H  
16 Athens, GA-30605, USA  
17 tsingh@uga.edu

18  
19 **Abbreviated title:** Perceptual decisions during rapid reaching and interception

20  
21 **Keywords:** interception, smooth pursuit, object recognition, dorsal-ventral interactions,  
22 reaching.

23  
24 **Disclosures:** The authors declare no conflict of interest, financial or otherwise.

25  
26 **Acknowledgements:** We thank Negar Bassiri and Chris Mejias for assisting with data  
27 collection. DAB received support from the American Heart Association (18POST34060183). A  
28 portion of this research was supported by a grant from the University of Georgia Research  
29 Foundation, Inc to TS.

30

31 **Abstract**

32 Visual processing in parietal areas of the dorsal stream facilitates sensorimotor  
33 transformations for rapid movement. This action-related visual processing is hypothesized to  
34 play a distinct functional role from the perception-related processing in the ventral stream.  
35 However, it is unclear how the two streams interact when perceptual identification is a  
36 prerequisite to executing an accurate movement. In the current study, we investigated how  
37 perceptual decision-making involving the ventral stream influences eye and arm movement  
38 strategies. Participants ( $N = 26$ ) moved a robotic manipulandum using right whole-arm  
39 movements to rapidly reach a stationary object or intercept a moving object on a virtual  
40 display. On some blocks of trials, participants needed to identify the shape of the object (circle  
41 or ellipse) as a cue to either hit the object (circle) or move to a pre-defined location away from  
42 the object (ellipse). We found that interception movements were initiated sooner and  
43 performed less accurately than reaches, a difference that increased in trials when perceptual  
44 decisions about object shape were made. Faster hand reaction times were correlated with a  
45 deliberate strategy to adjust the movement post-initiation - this strategy was more prominent  
46 during interception, when there is a greater perceived urgency to act. Saccadic reaction times  
47 were faster and initial smooth pursuit lags and gains greater during decisions, suggesting an  
48 interference between how eye movements are used for perception and for guiding limb  
49 movements. Together, our findings suggest that the extent to which ventral stream information  
50 is incorporated into visuomotor planning depends on imposed (or perceived) task demands.

51

52 **New and Noteworthy**

53 Visual processing for perception and for action are thought to be mediated by two specialized  
54 neural pathways. Using a novel visuomotor decision-making task, we show that participants  
55 differentially depended on online perceptual decision-making in reaching and interception, and  
56 that eye movements necessary for perception influence movement coordination strategies.  
57 These results provide evidence that task complexity modulates how pathways processing  
58 perception versus action information interact during the visuomotor control of movement.

59

## 60 **Introduction**

61 Many functional sensorimotor skills require rapid visual processing and perceptual  
62 decision-making. A very commonly encountered situation during driving is when drivers must  
63 decide whether to yield or stop at an intersection. The decision should be made from a  
64 distance by judging the shape of the sign at the intersection. If the shape is judged as a stop  
65 sign, the driver would slowly press their foot on the brake to bring the car to a gradual stop.  
66 However, if the shape is judged as a yield sign, the driver might just slow down or even hit the  
67 accelerator if there is no incoming traffic. The driver's ability to make the correct decision and  
68 movement depends on efficient real-time processing of visual sensory information in the two  
69 visual processing streams (Goodale and Milner 1992; Mishkin et al. 1983). The distance  
70 between the sign and the car, the presence of other incoming traffic, and the associated motor  
71 actions are almost certainly processed by the posterior parietal cortex along the dorsal visual  
72 stream (Culham et al. 2006; Rizzolatti et al. 2002; Rizzolatti and Matelli 2003). The shape and  
73 symbols on the sign are perceived by the lateral occipital and inferior temporal cortex along the  
74 ventral visual stream (Ales et al. 2013; Grill-Spector et al. 2001; Lehy and Tanaka 2016;  
75 Schwartz et al. 1983). Though the contributions of these streams to visuomotor and  
76 visuoperceptual processing is well delineated, it is still unclear how these two streams interact  
77 and process sensory information in real-time to facilitate rapid visuomotor actions.

78 Simple visuomotor reaching to stationary targets has been studied using the center-out  
79 reaching paradigm (Archambault et al. 2015; Clower et al. 1996; Goodale et al. 1986; Jax and  
80 Rosenbaum 2009) where participants fixate on a center-cross while waiting for a cue to initiate  
81 a reaching movement to a peripheral target. These studies have shown that the reciprocal  
82 connections between the parietal areas in the dorsal stream and the premotor areas subserve  
83 visuomotor processing and transformations during reaching movements (Caminiti et al. 1998;  
84 Pesaran et al. 2006). When a target appears in the periphery, participants first make a rapid  
85 saccade to it. The saccadic reaction times varies anywhere from 120-220 ms based on when  
86 the central fixation cross is turned off prior to the appearance of the peripheral target (Munoz  
87 and Corneil 1995; Stevenson et al. 2009). This is followed by the initiation of a reaching  
88 movement within 50-100 ms (Prablanc et al. 2003); the delay simply reflects the larger inertia  
89 of the arm (Biguer et al. 1982; Pélisson et al. 1986; Prablanc et al. 1979). The overall reaction  
90 time between target appearance and initiation of a limb movement encompasses the sensory,

91 cognitive, and motor processes involved in movement preparation (Haith et al. 2016; Prablanc  
92 et al. 1986; Smeets et al. 2016).

93         Based on Donders' framework of neural information processing (Donders 1969), the  
94 reaction time for simple visuomotor reaching movements consists of a two-stage process: (1)  
95 detection and localization of the stimulus in space; and (2) specification of an appropriate  
96 motor plan. Reflexive detection of visual stimuli is primarily accomplished by lower order  
97 neurons in the primary visual cortex, but target localization in space involves the parietal areas  
98 in the dorsal stream (Andersen et al. 1985; Colby and Goldberg 1992). Specification of motor  
99 plans involves coordinate transformations of target and hand locations into a single frame of  
100 reference (Beurze et al. 2006). The target locations are transformed in two steps; first from a  
101 world-centered to a retinotopic coordinate frame and then finally to a limb-centered reference  
102 frame (reviewed in Andersen and Buneo 2002; Boussaoud and Bremmer 1999; Pesaran et al.  
103 2006). These transformations are computationally intensive and involve different frontoparietal  
104 nodes along the dorsal visual stream and the premotor cortex.

105         In contrast to reaching movements made to stationary targets, moving targets add  
106 additional complexities for target localization and motor plan specification. Specifically,  
107 suboptimal temporal integration of retinal and extraretinal signals during smooth pursuit eye  
108 movements create errors in spatial localization of targets (Brenner et al. 2001; Honda 1990;  
109 Schlag and Schlag-Rey 2002). Furthermore, the neural processes associated with coordinate  
110 transformation for moving targets are also computationally demanding. One study suggests  
111 that suboptimal transformation from the real-world to the retinotopic reference frame may result  
112 in higher number of movement errors during interception movements (Dessing et al. 2011).  
113 Taken together, these studies suggest that for moving targets, planning and execution of  
114 smooth pursuits and interception movements may constitute a significant computational  
115 burden for both target localization and movement specification, respectively.

116         Another way to add computational complexity to visuomotor reaching movements is to  
117 include a perceptual decision-making component to the task. This could be in the form of  
118 selection of alternative motor responses based on visuoperceptual decision-making, such as  
119 identification of visual features of stimuli (shape, color, etc.). The identification of visual  
120 properties, such as two-dimensional shape and color, is performed by the ventral visual stream  
121 (Konen and Kastner 2008; Lehky and Sereno 2007), whereas the appropriate limb motor

122 responses are selected by the dorsal visual stream and the dorsal premotor cortex (Grafton et  
123 al. 1998; Kalaska and Crammond 1995; Rushworth et al. 2003). The additional neural  
124 processing adds two intermediate stages to Donders's model of information-processing. Now  
125 the four information-processing stages for visuoperceptual motor tasks are: (1) detection of the  
126 stimulus, (2) identification of the stimulus, (3) selection of an appropriate motor response and  
127 (4) execution of the motor response (Donders 1969; Hecht et al. 2008; Smeets et al. 2016;  
128 Sternberg 1969). In humans, geometric shape recognition in the ventral stream approximately  
129 takes ~250 ms (Delorme et al. 2000; Doniger et al. 2000) and it takes another ~100-200 ms to  
130 initiate an arm movement (Thorpe and Fabre-Thorpe 2001). In contrast to the 50-100 ms  
131 delays associated with arm movements initiation during simple visuomotor reaching  
132 movements, the relatively longer time to initiate movements during ventral stream processing  
133 may be due to delays in integration of neural information between the two streams. Indeed, an  
134 indirect synaptic pathway between the inferior temporal neurons in the ventral stream and the  
135 motor cortex passes through the prefrontal and premotor cortices adding additional  
136 conduction and processing delays (Hegd e 2008; Thorpe and Fabre-Thorpe 2001). If  
137 processed perceptual information converges at the motor cortex only through this pathway,  
138 then ventral stream processing would be the rate-limiting step for movement specification.

139 The goal of the present study was to understand how adding computational complexity  
140 to dorsal stream and ventral stream processing affects the spatiotemporal course of movement  
141 specification. We asked two questions. First, compared to reaching movements, what are the  
142 additional computational costs associated with movement specification of interception  
143 movements? Our hypothesis for this question was that the reaction time of interception  
144 movements would be longer and accuracy reduced because of additional computations  
145 associated with rapid reference frame transformations from the real-world to the retinotopic  
146 reference frame. Second, how does engaging the ventral visual stream impact dorsal stream  
147 processes associated with movement specification?

148 To propose a hypothesis for the second question, we again drew from Donders's  
149 framework that suggests that the four stages of information processing are functionally distinct  
150 (Ulrich et al. 1999) and that information is processed sequentially at every stage, i.e. output of  
151 a stage serves as the input to the next stage. This would suggest that the neural processing in  
152 the ventral visual stream for object identification and response selection should be completed

153 before the dorsal stream processes an appropriate arm movement plan. However, many  
154 behavioral (reviewed in Gallivan et al. 2018; Hecht et al. 2008; Rosenbaum et al. 2007; Song  
155 and Nakayama 2008) as well as neurophysiological studies (reviewed in Cisek and Kalaska  
156 2010) have challenged the sequential-processing view. Recently, empirical support has been  
157 provided for simultaneous selection of multiple motor plans in the form of intermediate  
158 movements that reflect a spontaneous averaging of the kinematics of competing motor plans  
159 (Gallivan et al. 2016; Haith et al. 2015). Other studies, however, have suggested that  
160 movement specification may involve both simultaneous and sequential processing of different  
161 sensorimotor attributes (Dekleva et al. 2018; Wong and Haith 2017). Therefore, in time-  
162 constrained rapid visuomotor and perceptual decision-making tasks, movements may be  
163 initiated even before the object identification is complete (Haith et al. 2016). This would  
164 suggest that hand trajectories would be corrected online under visual feedback control. Thus,  
165 our second hypothesis was that under imposed (or perceived) time constraints, neural  
166 processing in the ventral and dorsal visual streams becomes more parallel and less sequential,  
167 resulting in more online adjustments of trajectories after movement initiation.

168 If participants were to guide interception movements under continuous visual feedback  
169 control (Brenner and Smeets 2011; Desmurget and Grafton 2000; Saunders and Knill 2003),  
170 this would suggest that perceptual decisions about object identity could be completed during  
171 movement execution. However, a previous visual perception study (Schütz et al. 2009) has  
172 shown that recognition of object properties during object motion is impaired, suggesting that  
173 smooth pursuit eye movements may cause disfacilitation in the ventral visual stream when  
174 both streams are simultaneously engaged during object tracking. Thus, our third hypothesis  
175 was that during interception movements and object recognition, participants would exhibit  
176 higher smooth pursuit gains (computed as ratio of eye velocity and target velocity) to  
177 compensate for the impaired recognition.

178 To test the three hypotheses, we designed a rapid visuomotor decision-making task  
179 where participants were asked to make either reaching (stationary targets) or interception  
180 movements (moving targets) towards an object (hit) if it was a circle and away from it (avoid), if  
181 it were an ellipse. We added another condition, in which objects moved either quickly or  
182 relatively slowly across the workspace for moving targets and stayed in the workspace for a  
183 short and relatively longer duration for the stationary targets. We expected that this additional

184 temporal constraint would elicit stronger interference between visuomotor processing and  
185 perceptual decision-making.

186

## 187 **Methods**

### 188 *Participants*

189 Twenty-six healthy, right-handed participants (16 women;  $23.7 \pm 5.5$  years) completed  
190 the experiment. All participants had no known history of neurological disorders and had normal  
191 or corrected-to-normal vision. Each participant provided written informed consent prior to  
192 participating and were compensated for their participation. All study procedures were approved  
193 by the Institutional Review Board at the University of Georgia.

194

### 195 *Apparatus*

196 Participants were seated in a chair and used their right hand to grasp the handle of a  
197 robotic manipulandum that could move in a horizontal plane (KINARM End-Point Lab, BKIN  
198 Technologies, Kingston, Ontario, Canada) (Fig.1A). All visual stimuli were projected at 60 Hz  
199 onto a semi-transparent mirror from a monitor above the workspace. This set-up allowed the  
200 stimuli to appear on the same horizontal plane as the handle and to occlude direct vision of the  
201 hand. During task performance, the robot applied a constant background force (-3 N in the Y  
202 direction) to the handle and recorded movement position and velocity at 1000 Hz. The  
203 monocular eye position of each participant was recorded at 500 Hz using a video-based  
204 remote eye-tracking system (Eyelink 1000; SR Research, Ottawa, ON Canada) integrated with  
205 the robot and calibrated for the 2D horizontal workspace. Data from the eye-tracker and robot  
206 were time-synced offline using MATLAB (version 9.5.0; The MathWorks, Natick, MA).

207

### 208 *Experimental design and procedure*

209 Participants performed rapid whole-arm reaching and interception movements in which  
210 they were instructed to either hit or avoid an object based on the object's shape. At the  
211 beginning of each trial, participants moved a cursor (white circle, 1 cm diameter) representing  
212 their veridical hand position to a start position (yellow circle, 2 cm diameter) located at the  
213 midline of the visual display ( $x=0$ ). After reaching the start position, a fixation cross appeared at  
214 the midline 22 cm from the start position in the y direction. Participants were required to

215 maintain fixation and keep their hand at the start position for 500 ms, after which the fixation  
216 cross and start position disappeared.

217         Following a fixed 200 ms delay, a yellow object was presented on the display near  
218 either the left or right edge of a rectangular box (34 x 34 cm) centered on the midline and 22  
219 cm above the start position (see Fig. 1B). The possible object shape on a given trial, and the  
220 participant's task, depended on the experimental block (Table 1). During No Decision blocks,  
221 participants were informed that the object shape would always be a circle (2 cm diameter), and  
222 that they should hit the circle as quickly and as accurately as possible. During Decision blocks,  
223 participants were informed that the object would appear as either a circle or an ellipse (major  
224 axis = 2.3 cm; minor axis = 2 cm) with equal probability. The lengths of the ellipse axes were  
225 selected to ensure that the object must be foveated to differentiate it from a circle. As in No  
226 Decision blocks, if the participants saw a circle, they were instructed to hit it as quickly and as  
227 accurately as possible. However, if an ellipse appeared, participants were instructed to avoid  
228 hitting the ellipse and instead move in the opposite direction toward a horizontal bar (10 cm  
229 width) centered on the midline and -4 cm from the start position in the y direction (see Fig. 1B).  
230 Thus, in contrast to No Decision blocks, in which participants could simply plan to hit the object  
231 on every trial, Decision block trials required the participant to correctly identify the object shape  
232 in order to perform the appropriate action (i.e., hit the circle or avoid the ellipse). Therefore, in  
233 addition to the No Decision blocks, the Decision condition required two additional steps, object  
234 identification and selection of an appropriate motor plan.

235         For each block of trials, the object either moved horizontally across the display  
236 (Intercept) or remained in the same position (Reach). On Intercept trials, the object appeared  
237  $\pm 16$  cm to the left or right of the midline (Y position range 14.5 - 17 cm from the start position;  
238 uniform distribution), and traversed at a constant Euclidean velocity of  $\pm 40$  cm/s (Fast) or  $\pm 34$   
239 cm/s (Slow) toward the other horizontal boundary of the rectangular box. The varying object  
240 velocity (see Table 1) was added to test the hypotheses under stricter conditions of time  
241 constraints. On Reach trials, the object appeared to the left or right of the midline with starting  
242 positions drawn from a uniform distribution (X position range:  $\pm 13$  - 16 cm from midline; Y  
243 position range 14.5 - 17 cm in front of start position) and remained stationary. For both types of  
244 trials, the object remained on the visual display until it was hit or the maximum trial duration  
245 was reached. On Intercept trials, the maximum trial duration equaled the time it took for the



246 object to reach the horizontal boundary given its velocity: 800 ms for fast velocities ( $\pm 40$  cm/s)  
247 and 950 ms for slow velocities ( $\pm 34$  cm/s). To match the Intercept trial durations, objects that  
248 were not hit remained on the screen for 800 ms (Fast) or 950 ms (Slow) during Reach trials.

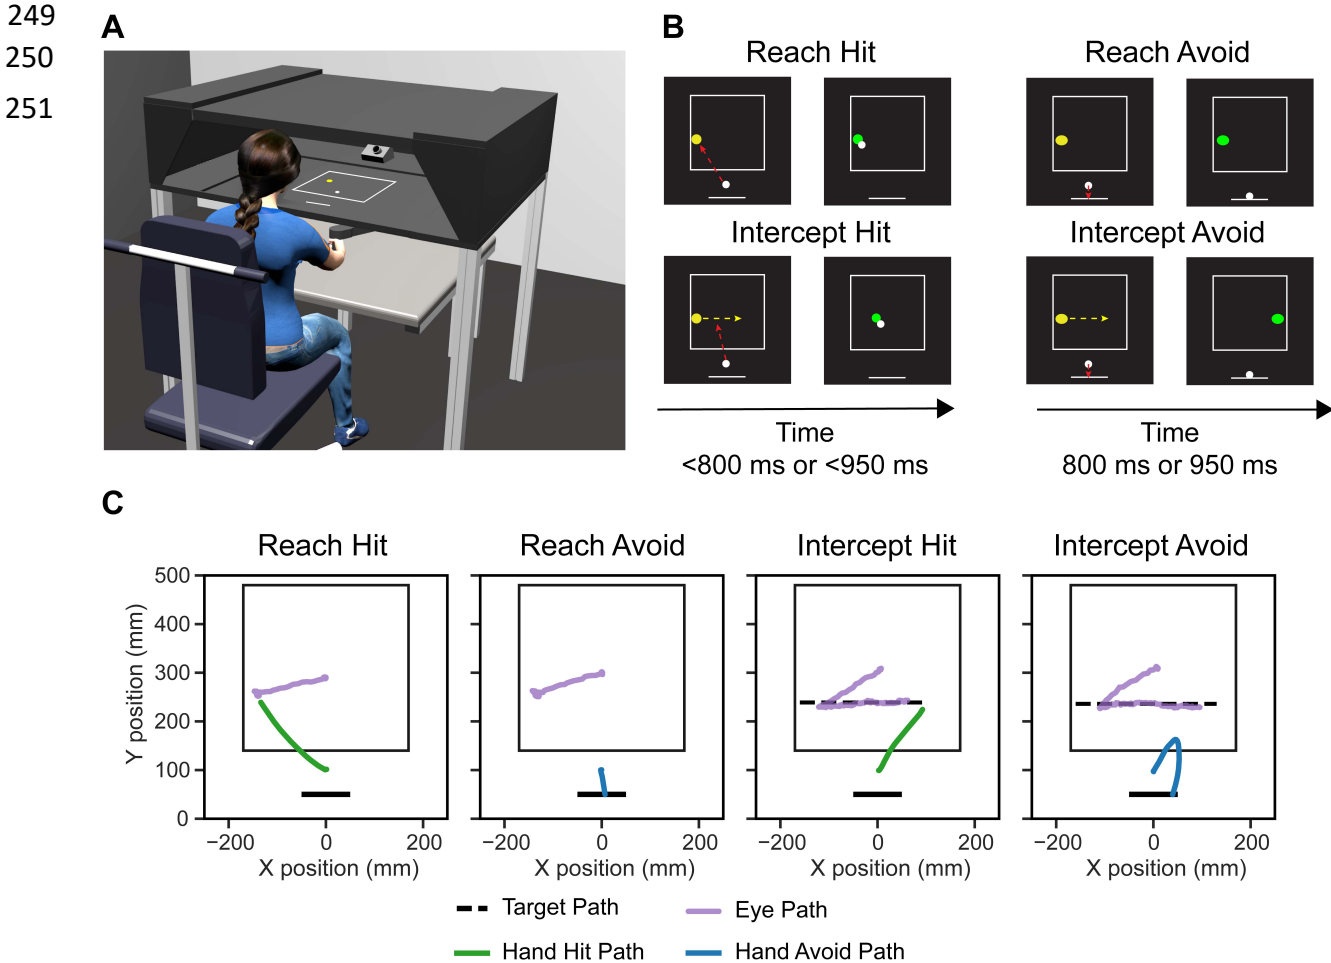

**Figure 1.** Experimental design and example trials. *A*: Experimental setup. Participants moved a robotic manipulandum with their right hand to control a cursor (white circle) in response to an object (yellow circle) on the visual display. A remote gaze-tracker at the back of the workspace recorded eye positions in Cartesian coordinates of the workspace. *B*: Trial types. On every trial, participants were instructed to hit or avoid depending on object shape (hit circle, avoid ellipse). No Decision blocks consisted of only circles; Decision blocks mixed circle and ellipse trials with equal probability. Participants either reached a stationary object (Reach trials) or intercepted a moving object (Intercept trials). The object turned green for correct hits (circle hits) and red for incorrect (if ellipses were hit). Similarly, if a circle was missed, it turned red at the end of the trial, and if an avoiding movement was made towards the bar when an ellipse appeared in the workspace, it turned green at the end of the trial (Fast: 800 ms; Slow: 950 ms). *C*: Sample 2D eye and hand paths for each trial type from a representative participant.

252 Performance feedback was provided for 500 ms once the object was hit or the  
253 maximum trial duration was reached. If a circle was correctly hit, the circle would turn green; if  
254 the circle was missed it would turn red. An ellipse would turn red if it was incorrectly hit instead  
255 of avoided and would turn green if correctly avoided. The next trial began following after a  
256 1500 - 2000 ms delay (see Fig. 1B).

257 Participants performed 8 experimental blocks of 90 trials each (720 trials total). Block  
258 order was counterbalanced across participants. Each experimental block consisted of a unique  
259 combination of decision type (No Decision or Decision), object motion (Reach or Intercept),  
260 and maximum trial duration (Fast or Slow) (Table 1). Object shape (during Decision blocks)  
261 and the object start location were randomized across trials within each block.

262

263 **Table 1. Experimental Blocks**

|             | Reach       | Intercept   |
|-------------|-------------|-------------|
| No Decision | <i>Fast</i> | <i>Fast</i> |
|             | <i>Slow</i> | <i>Slow</i> |
| Decision    | <i>Fast</i> | <i>Fast</i> |
|             | <i>Slow</i> | <i>Slow</i> |

*In No Decision blocks, the object to-be-hit is always a circle. In Decision blocks, the object is randomly selected to be either a circle or ellipse. The maximum trial duration (time object is viewable) is 800 ms for Fast trials and 950 ms for Slow trials, determined from the time it takes for the object to complete its path at Fast or Slow velocities in the Intercept condition.*

264

#### 265 *Data Analysis*

266 All hand and eye movement data were analyzed using MATLAB (version 9.5.0, The  
267 MathWorks, Natick, MA) and Python (version 3.7). Statistical analyses were performed in R  
268 (version 3.6.0).

269

#### 270 *Arm Movements*

271 Hand position and velocity data were first smoothed using a fourth-order Butterworth  
272 low-pass filter with a 5 Hz cutoff. Movement onset was defined as the time hand speed first

273 exceeded 5% of the first local peak speed. Reaction time (RT) was calculated as the time from  
274 object onset to movement onset. Trials were excluded if there was no identifiable RT or if RT  
275 was less than 100 ms (1.4% of all trials). Movement time (MT) was calculated from movement  
276 onset to the time the cursor intersected the object (circle or ellipse). Because the “avoid”  
277 movements made towards the bar were kinematically different, they were not used for  
278 analyzing MT. The initial direction (ID) of the movement was calculated as the angle between  
279 the midline and the vector linking the hand position at the start to the hand position at peak  
280 acceleration. To assess the curvature of the trajectories, we calculated the normalized arc  
281 length, defined as the ratio between the arc length of the movement (summed absolute  
282 difference between every two points) and the arc length of the line connecting the start and  
283 end positions. A normalized arc length of 1 indicates an ideal straight-line path, whereas  
284 values greater than 1 indicate more curvature.

285 Each trial was classified based on the trial type and the hand positions during the  
286 movement. A trial was classified as attempting to hit the object if the hand position was closer  
287 to the object than to the bar at the end of the trial. Otherwise, the trial was classified as  
288 attempting to avoid the object. Trials were excluded if participants received correct feedback  
289 despite inaccurate motor performance; this was the case when the participant hit the circle  
290 only after missing the object on the initial attempt (2.3% of all trials) or when they attempted to  
291 hit an ellipse but missed (2.4% of Decision block trials).

292 The accuracy of trials in the No Decision blocks was based purely on motor  
293 performance. Trials were either classified as a “correct hit” if the circle was hit in the allotted  
294 time, or a “motor error” otherwise. Accuracy of the trials in the Decision block could be further  
295 classified based on signal detection theory nomenclature (Green and Swets 1966): “correct hit”  
296 if the circle was hit, “miss” if the circle was not hit, “correct avoid” if the ellipse was avoided,  
297 and “incorrect hit” if the ellipse was hit. The “misses” were subsequently divided into two  
298 subcategories based on presumed participant intent: if the participant initially aimed toward  
299 and attempted to hit the circle, the trial was classified as a “motor error”; otherwise the trial was  
300 classified as an “incorrect avoid”, implying the participant made an incorrect choice about the  
301 object shape. Decisional accuracy during the Decision blocks was calculated as the proportion  
302 of correct hits and correct avoids relative to all non-motor error trials.

303 Finally, we were interested in how participants successfully planned their movements  
304 relative to the ongoing decision-making process during the Decision blocks. To this end, we  
305 examined the hand kinematics when the participant made “correct avoid” movements: on  
306 these trials, participants either moved directly to the bar (direct avoid), or first moved toward  
307 the object before re-directing to avoid the object and hit the bar (indirect avoid). We defined a  
308 trial as a direct avoid if the initial direction was aimed toward the bar ( $ID > 90^\circ$  with respect to  
309 the midline) and an indirect avoid if initially aimed toward the object ( $ID < 90^\circ$  with respect to  
310 the midline). The indirect avoid ratio was calculated as the proportion of indirect avoids over  
311 the overall number of correct avoids.

312

### 313 *Eye Movements*

314 Gaze data were low-pass filtered with a 20 Hz cutoff, and artifacts due to blinks, spikes,  
315 and gaze positions outside of the calibrated workspace. A previously validated geometric  
316 method was then used to transform gaze data from the eye-tracker onto the horizontal plane  
317 (Singh et al. 2017; Singh et al. 2016). Trials containing missing data or gaze angular velocities  
318 exceeding  $3000^\circ/\text{s}$  were manually inspected. If gaze events for the manually inspected trials  
319 could be reliably determined, then missing data and artifacts were corrected via interpolation;  
320 otherwise the gaze data were discarded for that trial. For Reach trials, saccades and fixations  
321 were identified using adaptive velocity-based thresholds for each participant. A similar  
322 procedure was used to separate saccades and smooth pursuit events during Intercept trials.  
323 Note that a gaze event was only classified as a fixation (in Reach trials) or smooth pursuit (in  
324 Intercept trials) if the target was foveated.

325 Individual saccades were discarded if the duration was  $<5$  ms, and individual fixations  
326 and smooth pursuits were discarded if the duration was  $<40$  ms. On some trials, participants  
327 made predictive saccades anticipating the location of the object. Since we were only  
328 concerned with visually-guided performance, we eliminated any saccade initiated  $<100$  ms  
329 after target onset and any initial saccade not directed to the object ( $>100$  mm from object).  
330 Following exclusion of individual saccades, we defined a valid trial for the task as one  
331 containing an initial saccade to the target followed by a fixation or smooth pursuit. Thus, gaze  
332 for a trial was not analyzed if the trial did not contain a valid saccade and a gaze event (fixation

333 or pursuit) or if a gaze event (fixation or pursuit) occurred before any saccade. Overall, gaze  
334 data were included for 90.7% of Reach trials and 88.6% of Intercept trials.

335 Saccadic reaction time (SRT) was calculated as the onset of the initial saccade for a  
336 given trial. Likewise, gaze onset was determined as the time participants first fixated on the  
337 target (in Reach trials) or began smooth pursuit of the target (for Intercept trials). For each  
338 Intercept trial, we determined the number of saccades during the entire gaze period (catch-up  
339 saccades), normalized by the trial's gaze duration. For Intercept trials, we also determined the  
340 smooth pursuit lag as the horizontal distance (mm) between the moving object and the eye  
341 position during pursuit (excluding catch-up saccades). Smooth pursuit gain was calculated as  
342 the eye velocity relative to the object velocity for the open-loop (first 100 ms of pursuit), first  
343 100 ms of the closed-loop (next 100 ms of pursuit), and full closed-loop (pursuit after first 100  
344 ms) phases. Of note, smooth pursuit gains are typically computed using eye-trackers with chin  
345 rests (Brostek et al. 2017; Churchland and Lisberger 2002) or eye-trackers that are head-  
346 mounted (Spering et al. 2005). With these eye-trackers, gaze movements are computed as  
347 eye-in-head movements. In contrast, we used a remote eye-tracker which allowed small head  
348 movements to occur. Thus, our estimates of pursuit gains tend to be higher than the ones  
349 previously reported in the literature.

350

### 351 *Statistical Analyses*

352 To compare accuracy, hand and eye kinematic variables across conditions, we  
353 conducted repeated-measures ANOVAs using decision type (No Decision or Decision),  
354 movement type (Reach or Intercept), and trial duration (Fast or Slow) as within-subject factors.  
355 To evaluate the relative incidence of reaching and interception errors during Decision blocks,  
356 error type (motor error, incorrect avoid, incorrect hit) was used as a within-subject factor.  
357 Finally, avoid type (Indirect or Direct) was used as a within-subject factor when comparing  
358 reaction times of the correct avoid trials. For all ANOVA tests, the alpha level was set at 0.05  
359 and effect sizes are reported using generalized  $\eta^2$ . Post hoc pairwise comparisons were  
360 conducted using the Holm correction (Holm 1979). Linear regression was used for bivariate  
361 comparisons, with alpha set to 0.05 and Holm's correction for multiple comparisons.

362

## 363 **Results**

### 364 *General performance characteristics*

365 In the task, participants made rapid eye and arm movements in response to an object  
366 appearing on the visual display. On Reach trials, the object was located near the right or left  
367 edge of the display boundary. During Intercept trials, the object could be hit at any point as it  
368 moved horizontally at a constant Euclidean velocity from one boundary to the other. As  
369 illustrated in Figure 1C, after object onset participants typically made saccades directly to the  
370 object, followed by fixation on a stationary object (Reach trials) or smooth pursuit of a moving  
371 object (Intercept trials). On every trial, participants either attempted to hit the object by passing  
372 the cursor (representing hand position) through the object before the end of the trial or avoided  
373 the object by moving in the opposite direction toward a bar on the display.

374 Figure 2 shows the hand trajectories for two representative participants. Each line  
375 indicates the hand path from object onset until the participant hit their intended target (object or  
376 bar), or until the maximum trial duration (if neither the object nor the bar was hit). Each trial's  
377 accuracy was classified based on the movement trajectory: for No Decision blocks, in which all  
378 movements were directed toward the object, accuracy was based solely on motor  
379 performance—a trial was a correct hit if the object was hit prior to the maximum duration or a  
380 motor error if not. In contrast, accuracy during Decision blocks relied on both making the  
381 correct decision about object shape and executing an accurate motor plan. Correct hits (hitting  
382 a circle) and correct avoids (moving toward the bar on ellipse trials) indicated accurate  
383 decisions and motor plans, whereas incorrect hits (hitting the ellipse) and incorrect avoids  
384 (moving toward the bar on circle trials) constituted errors in decision-making. Motor errors  
385 during the Decision blocks were identified as attempting to hit but missing the circle (Fig. 2).

### 386 387 *More errors in perceptual decisions for interception than reaching*

388 Figure 3A shows that movement type, decision type, and trial duration all influenced  
389 overall performance accuracy. The percentage of correct hits was lower for interceptions than  
390 for reaches [main effect of movement type:  $F(1,25) = 88.64$ ,  $p < 0.001$ ,  $\eta^2 = 0.24$ ], and also  
391 lower for faster trial durations [main effect of trial duration:  $F(1,25) = 151.42$ ,  $p < 0.001$ ,  $\eta^2 =$   
392  $0.17$ ]. The decrease in correct hits at faster durations was larger for interceptions, [interaction  
393 of movement type and trial duration:  $F(1,25) = 6.50$ ,  $p = 0.02$ ,  $\eta^2 = 0.01$ ], indicating that faster

394 object velocity reduced interception performance beyond decreasing the time possible to hit  
395 the object.

396

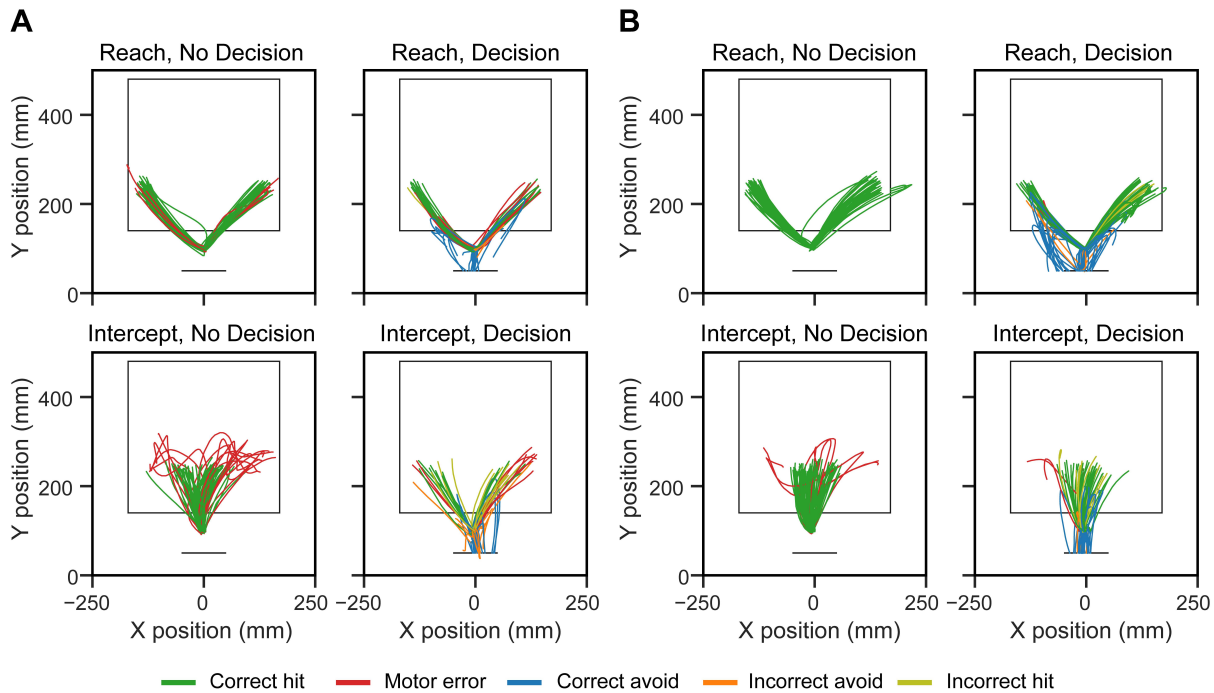

**Figure 2.** Example 2D trajectories from two representative participants. Each trajectory was classified as a correct hit of the circle, motor error (trying to hit circle but missing), correct avoid of the ellipse, incorrect avoid of the circle, or incorrect hit of the ellipse. *A*: This participant adjusted their interception trajectories during decision-making (see lower panels). *B*: This participant attempted to aim toward the midline for both Decision and No Decision Intercept blocks.

397

398 Overall, there was a direct decision cost on task performance, as the average  
399 percentage of correct hits decreased from  $94.4 \pm 0.5\%$  for No Decision blocks to  $83.7 \pm 1.9\%$   
400 for Decision blocks [main effect of decision type:  $F(1,25) = 50.39$ ,  $p < 0.001$ ,  $\eta^2 = 0.29$ ]. The  
401 decrease in accuracy for Decision blocks relative to No Decision blocks was larger for  
402 movements with faster trial durations [interaction of trial duration and decision type:  $F(1,25) =$   
403  $35.52$ ,  $p < 0.001$ ,  $\eta^2 = 0.06$ ], indicating that the participants were more affected by the imposed  
404 time constraints during decision-making.

405 Notably, the source of the errors (motor error, incorrect avoid, or incorrect hit) during  
406 Decision blocks differed depending on movement type and trial duration. During reaching  
407 movements, decision-making predominantly affected the motor error, but not decisional

408

409 accuracy. For Reach trials at fast durations, there was a higher percentage of motor errors  
 410 relative to incorrect avoids [ $t(130) = 4.40, p < 0.001$ ] and incorrect hits [ $t(130) = 4.08, p =$   
 411  $0.003$ ], whereas at slow durations, there were no differences in error percentage across the  
 412 three error types (Fig. 3A). Motor errors for Reach trials at fast durations were higher for  
 413 Decision blocks relative to No Decision blocks [ $t(92.8) = 6.86, p < 0.001$ ], suggesting that  
 414 under greater time constraints, participants tended to make correct decisions to hit the object  
 415 but did not reach it in time.

416

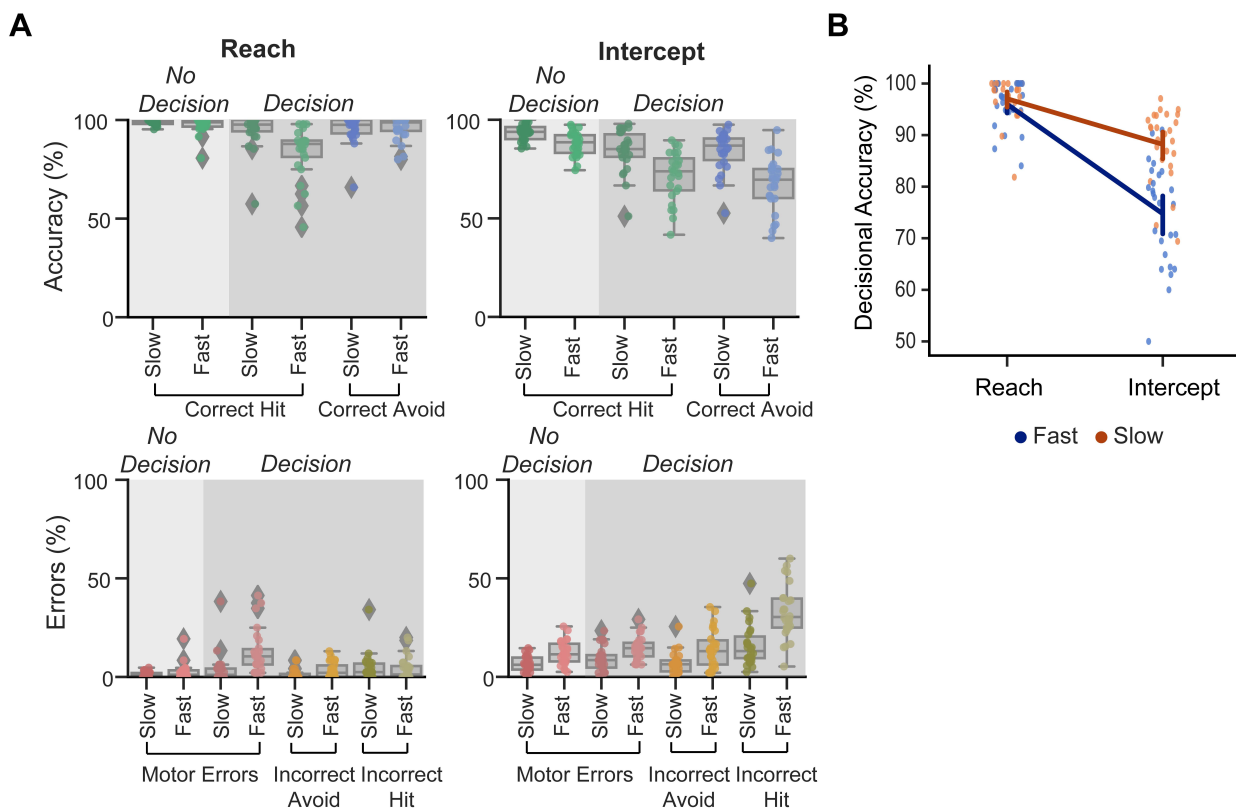

**Figure 3.** More errors in perceptual decisions for interception than reaching. A: Box plots of accuracy and errors across the different conditions. Each dot represents the mean for one participant for the given condition. Upper panels show the percentage of correct hits of the circle and correct avoids of the ellipse for reaching (left panel) and interception (right panel). Note that there were no correct avoids in No Decision blocks, as participants were instructed that the object would always be a circle. Lower panels show the percentage breakdown of the different types of errors (motor errors for No Decision blocks; motor errors, incorrect avoids, and incorrect hits for Decision blocks). For Decision blocks, the increase in errors was mainly due to motor errors for Fast reaches, and incorrect hits for Fast interceptions. B: Decisional accuracy percentage (correct hits and avoids relative to all non-motor error trials) for reaching and interception for fast (800 ms) and slow (950 ms) trial durations. Individual dots represent the mean for one participant. Error bars show the 95% confidence interval of the mean estimate.



417 In contrast, during Intercept trials, the percentage of incorrect hits at fast trial durations  
418 was higher than the percentage of incorrect avoids and motor errors [all  $t$ 's > 8.84, all  $p$ 's <  
419 0.001]. At slow trial durations, incorrect hit percentage was higher than incorrect avoid  
420 percentage [ $t(130) = 4.42$ ,  $p < 0.001$ ], but not motor error percentage [ $t(130) = 3.32$ ,  $p = 0.054$ ].  
421 This provides evidence of a default strategy of trying to intercept the object, especially when  
422 the object was moving faster. This strategy led to a similar percentage of motor errors in No  
423 Decision and Decision [Fast:  $t(92.8) = 1.41$ ,  $p = 0.16$ ; Slow  $t(92.8) = 1.84$ ,  $p = 0.07$ ], but a large  
424 decrease in decisional accuracy relative to Reach trials [main effect of movement type:  $F(1,25)$   
425 = 113.55,  $p < 0.001$ ,  $\eta^2 = 0.56$ ], especially at faster trial durations [interaction of trial duration  
426 and movement type:  $F(1,25) = 70.95$ ,  $p < 0.001$ ,  $\eta^2 = 0.18$ ] (Fig. 3B). Overall, these results  
427 suggest that adding perceptual decision-making to a time-constrained task had an opposite  
428 effect on reaching and interception: during reaching, motor errors increased, whereas during  
429 interception, decision errors increased but motor accuracy was preserved.

430

#### 431 *Initial movement strategy predicts decisional accuracy during interception*

432 In the current task, the object could be intercepted anywhere along the object's  
433 trajectory. To determine whether the decision about *where* to intercept might explain the  
434 decrease in decisional accuracy relative to reaching, we explored how participants initially  
435 aimed and landed their interceptive movements. Figure 4A shows the hit locations for all  
436 correct hit trials. In No Decision blocks, on average, participants tended to intercept the object  
437 slightly after it crossed the midline ( $M = 28.7 \pm 2.9$  mm from midline). In contrast, there was a  
438 clear shift in object hit locations during Decision blocks ( $M = 75.7 \pm 3.2$  mm from midline).  
439 Though interceptions were slightly more curved than reaches [main effect of movement type  
440 on normalized arc length:  $F(1,25) = 10.63$ ,  $p = 0.003$ ,  $\eta^2 = 0.08$ ], interceptions were made  
441 along a relatively straight-line path that did not differ between No Decision and Decision blocks  
442 [main effect of decision type:  $F(1,25) = 1.41$ ,  $p = 0.25$ ,  $\eta^2 = 0.01$ ] (see Fig. 4B). Furthermore,  
443 the final hit location was strongly correlated with the initial movement direction (No Decision:  $r$   
444 = 0.74,  $p < 0.001$ ; Decision:  $r = 0.77$ ,  $p < 0.001$ ), suggesting that participants were planning to  
445 intercept at a specific location rather than adjust their trajectory online (see Fig. 4C).

446 During Decision blocks, there were two main strategies for where to hit the object:  
447 participants either adjusted their movement trajectory to aim and hit the object away from the

448 midline (as in Fig. 2A) or attempted to hit the object near the midline, similar to performance in  
 449 No Decision blocks (as in Fig. 2B). To quantify the effects of these two strategies, we  
 450 calculated the mean difference in initial direction between No Decision and Decision blocks for  
 451 each participant—a larger difference in movement direction indicates the participant adjusted  
 452 their initial movement strategy during decision-making. Interestingly, the change in initial  
 453 movement direction was correlated with both reaction time ( $r = 0.53$ ,  $p = 0.01$ ) and incorrect hit  
 454 rate ( $r = 0.42$ ,  $p = 0.03$ ), that is, participants who relied on a default motor plan to hit the object

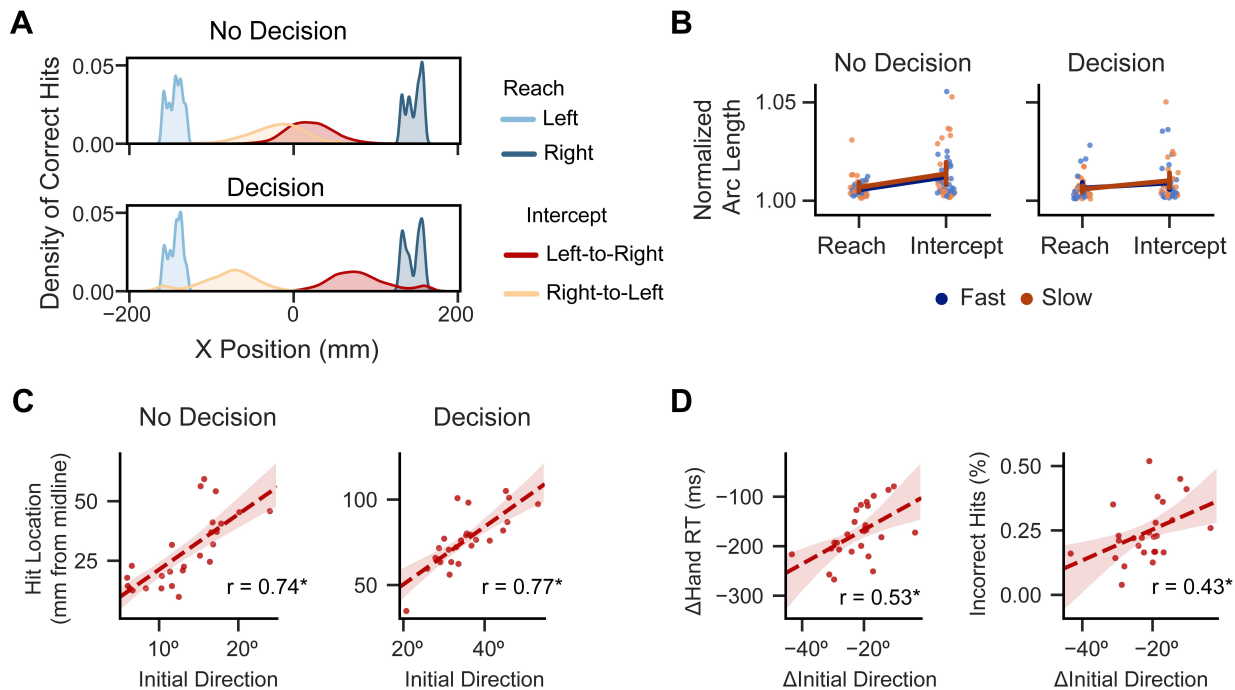

**Figure 4.** Initial movement strategy predicts decisional accuracy during interception. **A:** Univariate kernel density estimate of the horizontal hit position (0 mm = hit at the midline) for all correct hits of the circle. **B:** Arc length (summed absolute difference between every two points), normalized by the arc length of a straight-line path between start and hit positions. Both reach and interception movements were made along relatively straight paths (a normalized arc length of 1 indicates a perfectly straight-line path) and not different between decision blocks. Individual dots represent the mean for one participant. Error bars show the 95% confidence interval of the mean estimate. **C:** Initial movement direction of correct hits correlated with final hit location for No Decision (left panel) and Decision (right panel) interceptions, suggesting that participants planned to intercept objects at a specific location rather than make online adjustments to the trajectories. Shaded area represents the 95% confidence interval of the regression estimate. **D:** Participants who showed a larger mean change in initial movement direction from No Decision to Decision during interception showed a larger mean change in reaction time (left panel) and a lower percentage of incorrect hits (right panel). A negative change in initial movement direction indicates movements during Decision blocks were directed farther from the midline relative to No Decision blocks. For all regression plots, each dot represents the mean value for one participant. Shaded area represents the 95% confidence interval of the regression estimate. \* indicates  $p < 0.05$ .

455 independent of the perceptual decision were more likely to make decision errors (Fig.  
456 4D). These results suggest that some participants used a default strategy of initiating similar  
457 movements for both No Decision and Decision conditions. Other participants who adjusted  
458 their initial movement strategy also exhibited improved decisional accuracy.

459

#### 460 *Interceptions and perceptual decisions differentially affect reaction and movement times*

461 Figure 5 shows RTs and MTs for movements in which participants aimed toward and  
462 attempted to hit the circle: 94.1% of all No Decision trials, 48.7% of all Decision trials (Note that  
463 in Decision blocks, half of the trials were ellipses). Unexpectedly, in No Decision blocks, hand  
464 RTs were on average 22 ms faster for interceptions than for reaches, despite the higher  
465 difficulty associated with planning to intercept a moving target [main effect of movement type  
466 for No Decision:  $F(1,25) = 13.02$ ,  $p = 0.001$ ,  $\eta^2 = 0.07$ ] (see Fig. 5A). Post-hoc tests showed  
467 that the difference was mainly due to shorter RTs for interception relative to reaching at Fast  
468 trial durations [Fast:  $t(35) = 4.00$ ,  $p = 0.002$ ; Slow:  $t(35) = 2.56$ ,  $p = 0.06$ ]. As shown in Figure  
469 5B, movement time for Fast trial durations were shorter [main effect of trial duration for No  
470 Decision:  $F(1,25) = 16.04$ ,  $p < 0.001$ ,  $\eta^2 = 0.02$ ], but were not different between reaching and  
471 interception [main effect of movement type for No Decision:  $F(1,25) = 3.79$ ,  $p = 0.06$ ,  $\eta^2 =$   
472 0.05].

473 As expected, perceptual decision-making led to a significant RT delay. Relative to No  
474 Decision blocks, RTs for Decision blocks were  $173 \pm 11$  ms RT longer during Intercept trials,  
475 and  $189 \pm 10$  ms longer during Reach trials [main effect of decision type:  $F(1,25) = 483.5$ ,  $p <$   
476  $0.001$ ,  $\eta^2 = 0.78$ ] (Fig. 5A). Thus, perceptual decisions involving the ventral stream clearly  
477 increased processing time for object identification (circle or ellipse) and motor response  
478 selection (hit or avoid). Similar to No Decision blocks, RTs during Decision blocks were also  
479 faster for Intercept trials and for Fast trial durations [main effect of movement type for Decision:  
480  $F(1,25) = 22.49$ ,  $p < 0.001$ ,  $\eta^2 = 0.11$ ]; main effect of trial duration for Decision:  $F(1,25) =$   
481  $40.00$ ,  $p < 0.001$ ,  $\eta^2 = 0.05$ ]. The RT difference between Intercept and Reach trials was greater  
482 for Decision blocks (Intercept 38 ms faster) than No Decision blocks (22 ms faster) [ $t(25) =$   
483  $2.12$ ,  $p = 0.04$ ]. Together, the RT results suggest that interceptive movements, shorter trial

484 durations, and decision-making interact to encourage earlier movement initiation based on  
485 perceived time constraints.

486

487

488

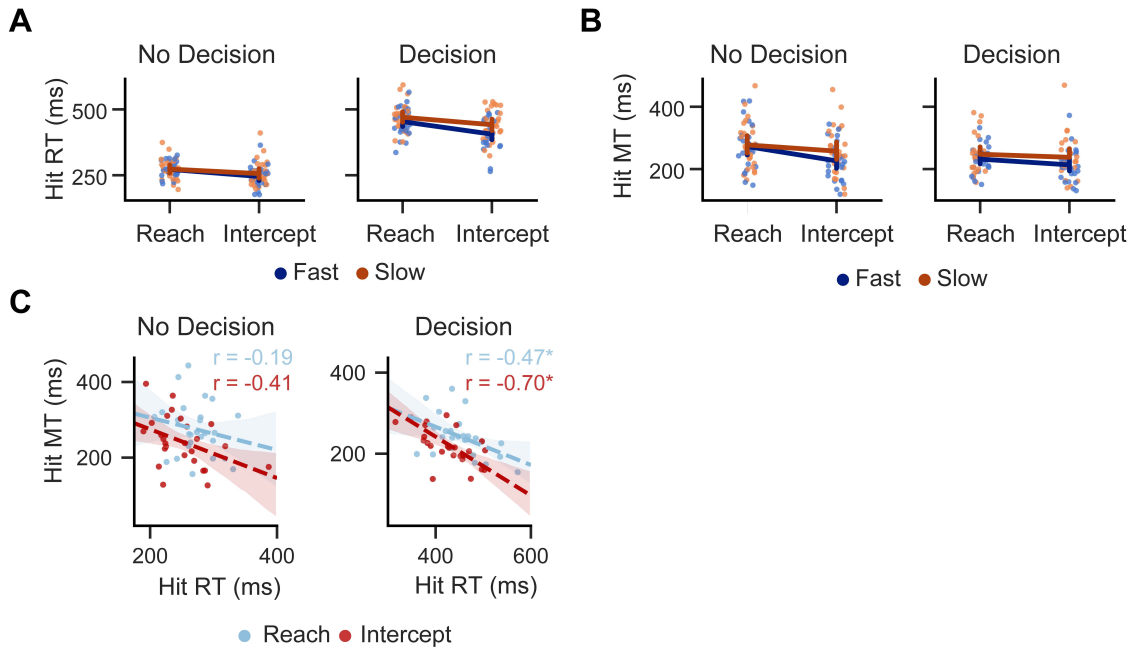

**Figure 5.** Interceptions and perceptual decisions differentially affect reaction and movement times. **A:** Reaction times of hits were longer in Decision blocks and shorter for interceptions in No Decision and Decision blocks. **B:** Movement times of hits were shorter for Decision blocks but no different between reaching and interception. Individual dots represent the mean for one participant. Error bars show the 95% confidence interval of the mean estimate. **C:** Reaction time and movement time are correlated during Decision (right panel), but not No Decision (left panel) blocks. Each dot represents the mean value for one participant. Shaded area represents the 95% confidence interval of the regression estimate. \* indicates  $p < 0.05$ .

489

490

491

492

493

494

495

496

497

498

Though the large increase in RT during Decision blocks suggests additional time devoted to perceptual decision-making, there is evidence that the RT delay also benefited the efficiency of movement specification: MTs of the correct hits were faster during Decision blocks for both Reach and Intercept trials [main effect of decision type:  $F(1,25) = 29.15$ ,  $p < 0.001$ ,  $\eta^2 = 0.04$ ] (Fig. 5B), likely a result of increased urgency (Thura and Cisek 2016) to hit the object following a prolonged RT period. The trade-off between the RTs and MTs of correct hits was most evident during decision-making: participants who had long RTs had faster MTs for Decision blocks (Reach:  $r = -0.47$ ,  $p = 0.01$ ; Intercept:  $r = -0.70$ ,  $p < 0.001$ ), but not for No Decision blocks (Reach:  $r = -0.19$ ,  $p = 0.34$ ; Intercept:  $r = -0.41$ ,  $p = 0.07$ ) (Fig. 5C). These results suggest that the RT delay for decisions was not solely for object identification and

499 motor goal selection, but also for planning to hit the object faster under more restricted time  
500 limits.

501

502 *Interception strategies favor ongoing decision-making after movement initiation*

503 To further investigate how movements are planned relative to time-sensitive decision  
504 processing, we analyzed motor performance during movements to “avoid” the ellipse during  
505 Decision blocks. As can be seen in Figure 2A, on some trials participants adopted an “indirect  
506 avoid” strategy of first moving toward the object as if they would hit it, only to curve back  
507 around to hit the bar if an ellipse was identified during the movement. On other trials,  
508 participants made “direct avoids,” moving in a straight-line path from the start position to the  
509 bar. Note that these indirect movements were predominantly observed for avoid decisions. The  
510 opposite pattern—moving toward the object after initially moving to avoid it, rarely occurred  
511 (<0.01% of Decision trials), highlighting the greater accuracy demands imposed by hitting the  
512 object vs. hitting the bar. To quantify participants’ strategy use, we calculated the proportion of  
513 correct avoids that were indirect, i.e., involved a “change-of-mind” after movement initiation  
514 (Resulaj et al. 2009). All participants had both indirect and direct avoids, indicating a mixture of  
515 strategies used during the task. Overall, indirect avoids were more common during interception  
516 than reaching [main effect of movement type:  $F(1,25) = 38.31, p < 0.001, \eta^2 = 0.21$ ] (Fig. 6A).  
517 This suggests that decisions about object shape were made (or refined) after movement  
518 initiation, and that the extent of this online processing depended on the computational  
519 complexity of the movement.

520 The advantage of this indirect launching strategy is participants could specify the more  
521 difficult motor command (hitting the object) early in the trial with enough time to complete the  
522 perceptual decision about shape and execute an easier movement (avoid and hit the bar) if  
523 necessary. If this is the case, indirect avoids should be associated with shorter RTs. Indeed,  
524 for both reaches and interceptions, indirect avoids had an average RT of  $384 \pm 9$  ms, relative  
525 to  $489 \pm 11$  ms for direct avoids [main effect of avoid type:  $F(1,25) = 106.56, p < 0.001, \eta^2 =$   
526  $0.47$ ] (Fig. 6B). Furthermore, as shown in Figure 6C, the initial direction of indirect avoids was  
527 similar to the initial direction of correct hits, indicating that even early movements were initiated  
528 with a specific motor plan to hit the circle. When trajectories of indirect avoids deviated from  
529 those of correct hits, they were directed farther from the midline than typical movements

530 (longer tail for indirect avoids in Fig. 6C), suggesting an intermediate motor plan that  
 531 incorporates uncertainty about ultimately hitting the circle or the bar.

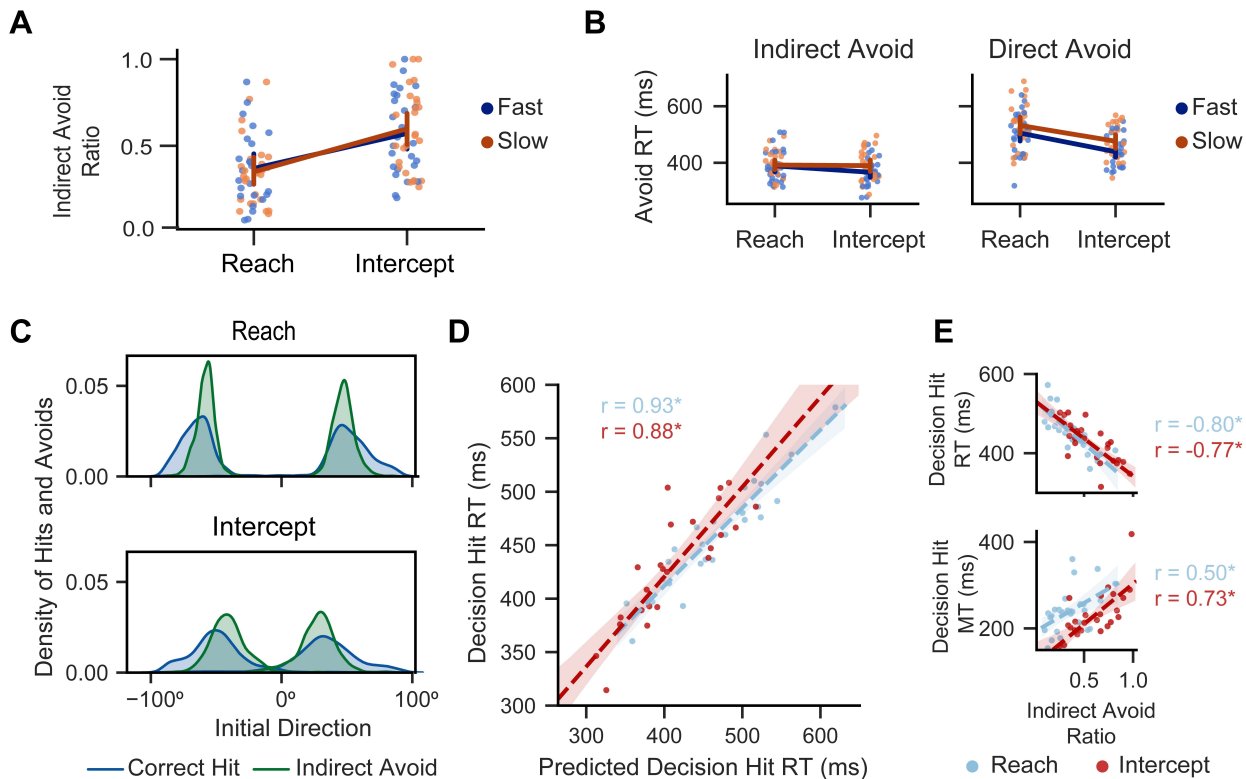

**Figure 6.** Interception strategies favor ongoing decision-making after movement initiation. *A:* Indirect avoid ratio (proportion of correct avoid movements initially aimed toward the ellipse over all correct avoids) during Decision blocks were higher for interception, suggesting more online adjustments after movement initiation. *B:* Mean reaction times for indirect (initially aimed toward ellipse) were shorter than direct (initially aimed toward bar) correct avoids. Individual dots represent the mean for one participant. Error bars show the 95% confidence interval of the mean estimate. *C:* Kernel density estimate of the initial movement direction ( $0^\circ$  = aimed at midline) for indirect avoids of the ellipse showed a similar distribution to correct hits of the circle during Decision blocks for reaching (upper panel) and interception (lower panel). *D:* Reaction times of correct hits during Decision blocks could be predicted from the sum of a participant’s mean reaction times for indirect and direct avoids, weighted by the relative proportion of indirect and direct avoids for that participant. *E:* Participant’s with higher indirect avoid ratios exhibited lower reaction times (upper panel) and higher movement times (lower panel) times for correct hits. Each dot represents the mean value for one participant. The shaded area represents the 95% confidence interval of the regression estimate. \* indicates  $p < 0.05$ .

532 Across participants, there was large variability in “avoid strategy” (indirect vs. direct) and  
 533 RTs. To test if a participant’s avoid strategy could explain their reaction time across all decision  
 534 trials, we developed a simple model of RT for correct hits during decision-making:

535

536

$$\widehat{RT}_{Hit} = Prop_{indirect} * RT_{indirect} + (1 - Prop_{indirect}) * RT_{direct}$$

537

538 where  $Prop_{indirect}$  is the proportion of indirect hits for a participant, and  $RT_{indirect}$  ( $RT_{direct}$ ) is  
539 the participant's mean RT for indirect (direct) avoids. This model strongly predicted a  
540 participant's observed RT for correct hits during Decision blocks [Reach:  $r = 0.93$ ,  $p < 0.001$ ;  
541 Intercept:  $r = 0.88$ ,  $p < 0.001$ ], which suggests that participants initiated their movement based  
542 on a perceived sense of urgency (see Fig. 6D). Furthermore, participants with a higher  
543 proportion of indirect avoids exhibited shorter hit RTs [Reach:  $r = -0.80$ ,  $p < 0.001$ ; Intercept:  $r$   
544  $= -0.77$ ,  $p < 0.001$ ] and longer MTs [Reach:  $r = 0.50$ ,  $p = 0.03$ ; Intercept:  $r = 0.73$ ,  $p < 0.001$ ].  
545 This suggests that participants with earlier RTs during Decision blocks relied more on online  
546 adjustments and decision-making post-movement initiation (Fig. 6E).

547

548 *Saccadic reaction times are faster and decoupled from hand reaction time during perceptual*  
549 *decisions*

550 Saccades, fixations (for Reach trials), and smooth pursuits (for Intercept trials) were  
551 identified using a geometric method to transform gaze data to the horizontal plane and  
552 adaptive velocity-based thresholds (Singh et al. 2016) for each participant (see Fig. 7A). Since  
553 standard task performance consisted of an initial saccade followed by onset of gaze (fixation or  
554 smooth pursuit), we restricted our eye movement analysis to the trials that followed that  
555 structure (see Methods for details).

556 Figure 7B plots the distribution of saccadic reaction times (SRTs), gaze onsets, and  
557 hand RTs relative to object onset. In No Decision blocks, gaze onset and hand RT were near-  
558 simultaneous, with hand RT occurring  $13.6 \pm 7.6$  ms after gaze onset for Reach trials and  $11.3$   
559  $\pm 9.2$  ms after gaze onset for Intercept trials. In contrast, there was a large delay between gaze  
560 onset and hand RT in Decision blocks (Reach gaze-to-RT:  $216.5 \pm 10.5$  ms; Intercept gaze-to-  
561 RT:  $189.7 \pm 11.6$  ms), indicating a de-coupling of eye and arm movement during perceptual  
562 decision-making. Interestingly, compared to No Decision blocks, SRTs were on average 14 ms  
563 faster during Decision blocks for reaches and 14 ms faster for interceptions [main effect of  
564 decision type:  $F(1,25) = 28.06$ ,  $p < 0.001$ ,  $\eta^2 = 0.11$ ]. Fixation onset was also faster during  
565 Decision blocks for Reach trials, but there was no effect of decision on onset of smooth pursuit  
566 [Reach:  $t(43.6) = -4.31$ ,  $p < 0.001$ ; Intercept:  $t(43.6) = 0.94$ ,  $p = 0.35$ ].

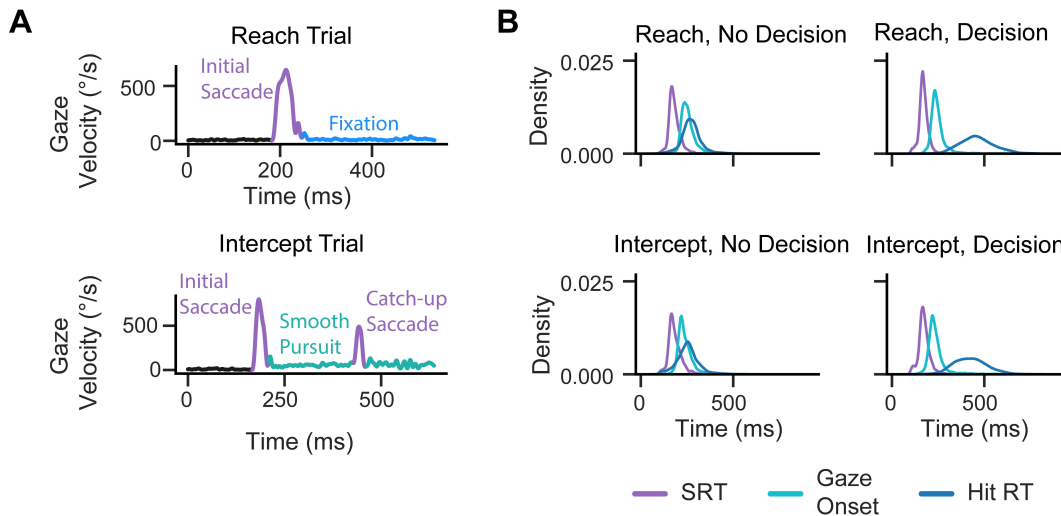

**Figure 7.** Saccadic reaction times are faster and decoupled from hand reaction time during perceptual decisions. *A*: Two representative trials showing classification of gaze events using adaptive velocity-based thresholds. In reaches to stationary objects, saccades are differentiated from fixations; in interceptions of moving objects, saccades are differentiated from smooth pursuit movements. *B*: Kernel density estimate showing the close distribution of saccadic reaction times, gaze onsets, and reaction times for circle hits across participants during No Decision, which become more spread out in Decision blocks. Mean saccadic reaction times were faster in Decision blocks.

567 *Higher smooth pursuit gains occur in interception movements during perceptual decisions*

568 During interception, the initial saccade landed behind the object and continued to lag  
 569 during smooth pursuit (see Fig. 8A). As expected, initial saccade and smooth pursuit lag was  
 570 larger for Fast trial durations (i.e., when the object was moving at faster velocities) [initial  
 571 saccade main effect of trial duration:  $F(1,25) = 41.91$ ,  $p < 0.001$ ,  $\eta^2 = 0.06$ ]; smooth pursuit  
 572 main effect of trial duration:  $F(1,25) = 136.18$ ,  $p < 0.001$ ,  $\eta^2 = 0.34$ ]. In addition, the mean lag  
 573 amplitude was larger during Decision blocks for both the initial saccade [main effect of decision  
 574 type:  $F(1,25) = 18.02$ ,  $p < 0.001$ ,  $\eta^2 = 0.04$ ] and smooth pursuit [main effect of decision type:  
 575  $F(1,25) = 22.33$ ,  $p < 0.001$ ,  $\eta^2 = 0.16$ ]. This result suggests that participants made larger  
 576 oculomotor errors when perceptual decision-making was required.

577 As shown in Figure 8A, by around 300 ms, there was no longer a difference in object  
 578 lag between No Decision and Decision blocks. This effect is also evident by analyzing the  
 579 smooth pursuit gain: while there is no effect of decision type on gain during the open-loop  
 580 period (first 100 ms) [main effect of decision type:  $F(1,25) = 3.71$ ,  $p = 0.07$ ,  $\eta^2 = 0.01$ ], gain is  
 581 increased for Decision blocks relative to No Decision blocks during the closed-loop period  
 582 [main effect of decision type:  $F(1,25) = 39.01$ ,  $p < 0.001$ ,  $\eta^2 = 0.13$ ] (Fig. 8 B,C). This effect is



583 not simply due to longer pursuit durations during Decision blocks, as gains are also longer  
584 when the analysis is restricted to the first 100 ms of the closed-loop period [main effect of  
585 decision type:  $F(1,25) = 10.83$ ,  $p = 0.003$ ,  $\eta^2 = 0.03$ ]. This suggests that the negative closed  
586 feedback loop that minimizes retinal error between gaze and target is engaged differently  
587 when perceptual decision-making occurs during pursuit eye movements. Finally, the  
588 normalized number of catch-up saccades occurring during pursuit, was slightly higher during  
589 Decision blocks [main effect of decision type:  $F(1,25) = 10.58$ ,  $p = 0.003$ ,  $\eta^2 = 0.09$ ] (Fig. 8D).  
590 Together, these results suggest that ocular movements are altered when object shape must be  
591 identified in addition to the object's spatial location.

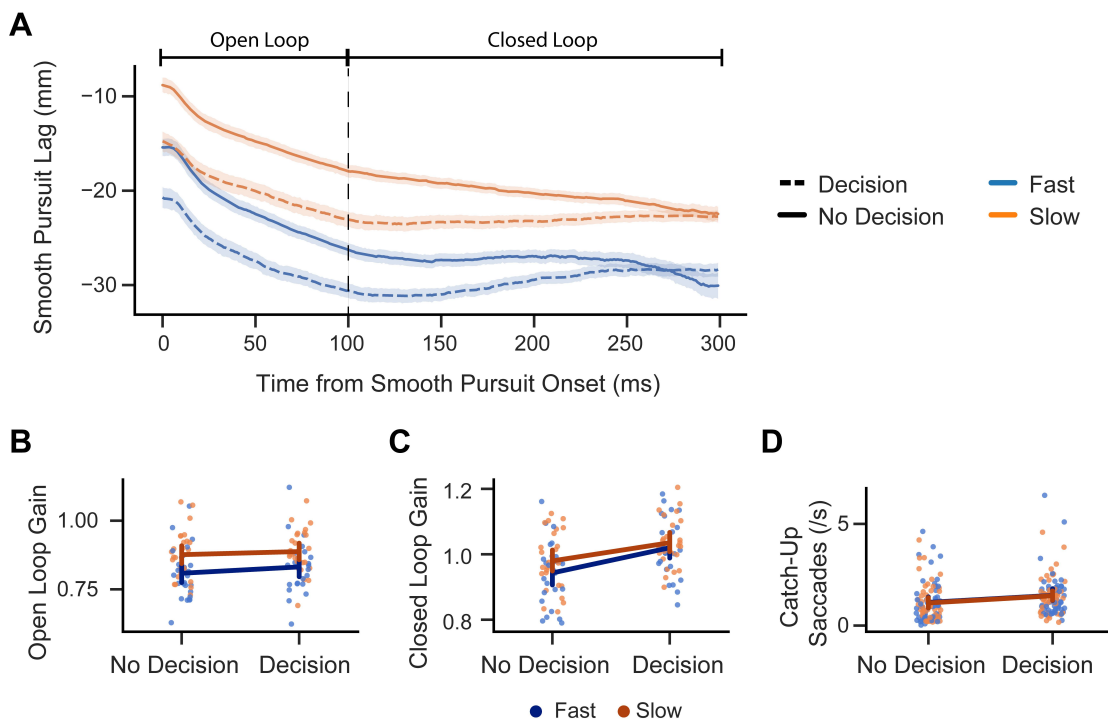

**Figure 8.** Higher smooth pursuit gains occur in interception movements during perceptual decisions. *A*: Smooth pursuit lag across interception trials as a function of time from smooth pursuit onset. Positive values indicate that the pursuit led the object, whereas negative values indicate lag. Participants lagged more during Decision blocks and in Fast trial durations (higher object velocity). The shaded area represents the 95% confidence interval of the mean estimate at each time point. *B*: Open-loop gain (first 100 ms) during interception was higher at Fast trial durations but did not differ between decision blocks, whereas *C*: closed-loop gain and *D*: the number of catch-up saccades per second were higher in Decision blocks. Individual dots represent the mean for one participant. Error bars show the 95% confidence interval of the mean estimate.

## 592 **Discussion**

593 In the current study, we asked the question: how does perceptual decision-making  
594 involving the two visual streams affect visuomotor coordination in reaching and interception  
595 movements? To address this question, we developed a novel visuomotor task where  
596 participants either made reaching or interception movements to stationary or moving targets,  
597 respectively. In one condition, based on the shape of the object, participants had to decide  
598 whether to make a reaching or interception movement. If the object were a circle, they were  
599 instructed to reach towards (or intercept) the target. If the object were an ellipse, they were  
600 asked to make a movement away from the ellipse towards a horizontal bar.

601 We proposed three hypotheses in this study. First, we hypothesized that the  
602 interception movements would require additional computations associated with rapid  
603 coordinate transformations from the real-world to the retinotopic reference frame, and as a  
604 result, interception movements would show longer reaction times and reduced accuracy.  
605 Though interception movements were less accurate, reaction times for interception  
606 movements were in fact shorter than reaching movements. Thus, our first hypothesis was not  
607 supported. Our second hypothesis was that under time pressure, neural processing involving  
608 both the ventral and dorsal visual streams should become more parallel. In support of this  
609 hypothesis, we found faster reaction times and more subsequent movement adjustments that  
610 reflected online decision-making after movement initiation. Our third and final hypothesis was  
611 that in the interception task, the smooth pursuit gains will be higher to pursue moving objects  
612 more closely and compensate for the impaired and slower object identification that occurs  
613 during pursuit eye movements. This hypothesis was supported.

614

### 615 *Shorter reaction times for interceptions suggest reflexive arm initiation to moving targets*

616 Interception movements refer to a broad category of movements (catch the object, hit or  
617 kick it away, or redirect its trajectory) directed towards moving objects (reviewed in Brenner  
618 and Smeets 2018). One of the most well-studied interception movements are projectile  
619 catching movements (Cesqui et al. 2012; Lacquaniti et al. 1993; Tombini et al. 2009; Zago et  
620 al. 2009). Visuomotor coordination in these interceptive movements is constrained by the  
621 spatiotemporal kinematics of the target under gravity like conditions. The target travels along a

622 rectilinear or curvilinear path and interception movement involves getting the arm into the path  
623 of the projectile.

624 In contrast, the interception movements in our study involved chasing a moving target  
625 before it disappeared from the workspace. We found that interception movements were less  
626 accurate than reaching movements (see Fig. 3) and less accurate when objects moved faster.  
627 Furthermore, participants committed more motor errors for fast interceptions than fast reaches  
628 (Fast and Reach blocks). The movement times were similar for both the Reach and Intercept  
629 conditions, but were shorter for the Fast condition (see Fig. 5). Neural noise that causes a  
630 trade-off between movement speed and accuracy (Fitts 1954) partially explains why  
631 participants made a higher number of motor errors during the Fast Condition (for both Reach  
632 and Intercept movements), but it doesn't quite explain why movements were less accurate  
633 when targets were moving.

634 One prominent hypothesis is that goal-directed arm movements are controlled by the  
635 visuomotor system based on a difference vector between the positions of the hand and the  
636 target (Shadmehr and Wise 2005). Targets are localized in space through coordinate  
637 transformation from an extrinsic to an egocentric frame of reference through neural processing  
638 in networks spanning the parietal and premotor cortices (Bernier and Grafton 2010; Beurze et  
639 al. 2010; Pesaran et al. 2006). For moving targets, the dynamic location of the target in  
640 extrinsic space will need to be continuously transformed to a retinotopic reference frame,  
641 imposing a significant computational burden on the nervous system (Dimitriou et al. 2013).  
642 Thus, delays associated with neural processing of moving targets during online feedback  
643 control may result in a sluggish update of motor plans and erroneous outcomes. These delays  
644 in neural processing should also affect the planning phase of the movement and cause  
645 delayed initiation of movement. For example, a potential strategy during interception would be  
646 to project the current location of the target into the future, and then execute a linear arm  
647 trajectory towards the future location of the target. Computing the kinematic trajectory to the  
648 future target location requires both sensory processing and prediction and should add  
649 additional computational costs and slow down the initiation of the arm movement.

650 However, this oversimplified explanation is not empirically supported when we look at  
651 the reaction times for reach and interception movements; the reaction times for interception  
652 movements were shorter than the reaching movements. This result is difficult to reconcile with

653 the vector difference hypothesis because this hypothesis would predict that the planning of the  
654 interception movement vector should be at least as difficult as the planning of the reach  
655 movement vector. However, the shorter reaction times suggests a relatively automatic process  
656 associated with control of interception movements to moving targets. This is consistent with  
657 recent reports that propose that moving targets may impose a sense of perceived urgency and  
658 more reflexive control of interception movements than reaching movements (Cisek et al. 2009;  
659 Lara et al. 2018; Perfiliev et al. 2010; Reichenbach 2016). In other words, the automatic  
660 reflexive limb response may be initiated by the neural nodes involved in motion detection  
661 (areas MT/MST) while gating subsequent sensorimotor transformations in the parietal-  
662 premotor cortical loops that facilitate initiation of reaching movements to stationary targets  
663 (Pisella et al. 2000).

664 One limitation in our study is that reaching movements were made to the left or right  
665 edge of the workspace, whereas participants tended to intercept the object close to the midline  
666 (Fig. 4A). Thus, higher reaction times during reaching may be partially due to performing  
667 higher amplitude movements (Munro et al. 2007). However, movement times did not differ  
668 between movement types and shortening the maximum trial duration (Fast versus Slow)  
669 influenced reaction times in interceptions more than reaches. This provides support for the role  
670 of automatic limb responses to moving targets in explaining reaction times.

671

#### 672 *Greater online integration of ventral stream and decision processing during interception*

673 Vision for goal selection based on object properties and vision guiding the online control  
674 of movement have been conceptualized as two specialized processes mediated by the ventral  
675 and dorsal streams, respectively (Goodale and Milner 1992; Goodale and Westwood 2004).  
676 While much work has concerned how the two visual streams serve unique functional roles  
677 operating largely independent of each other, less is known about the interaction in more  
678 complex task environments. The current task was designed to force this interaction—that is, in  
679 order to perform the correct action (hit the object or avoid it), participants must first accurately  
680 identify the object's shape (circle or ellipse). We found that even under time constraints (800  
681 ms to hit the object in the Fast condition), participants could perform object recognition and  
682 formulate a decision prior to movement initiation. Relative to No Decision blocks, in which  
683 participants only needed to process object information to facilitate movement, there was an

684 average RT delay of 189 ms (during reaching) and 173 ms (during interception) in Decision  
685 blocks, which is within the processing delays associated with a ventral-prefrontal-motor  
686 pathway or ventral-basal ganglia-motor pathway for shape recognition and motor goal  
687 selection (Cisek and Kalaska 2010; Thorpe and Fabre-Thorpe 2001; Veerman et al. 2008).  
688 Thus, it is reasonable to assume from the average RTs across participants that perceptual  
689 processing engaging the ventral stream can fully precede dorsal stream involvement  
690 supporting sensorimotor transformations of the visual information for action.

691 However, closer investigation of the movement trajectories and corresponding RTs  
692 during “avoid” trials provides evidence that additional processing of object information and  
693 decision-making could occur after movement initiation. During both reaching and interception  
694 blocks, we observed that participants would occasionally initiate their movements toward the  
695 circle only to curve around past the original start location and hit the bar. The presence of  
696 these “indirect avoids” provide evidence of an evolving decision given accumulating stimulus  
697 information (Resulaj et al. 2009; Selen et al. 2012). In contrast to previous studies investigating  
698 sensorimotor decisions of the limb that vary the motion or spatial location of the target under  
699 different task demands (Burk et al. 2014; Gallivan et al. 2016; van den Berg et al. 2016), here  
700 we show that sensorimotor transformations computed in the dorsal stream can seamlessly  
701 integrate incoming information about object shape that originates in the ventral stream (Davare  
702 et al. 2007; Konen and Kastner 2008; Lehky and Tanaka 2016; Sereno and Maunsell 1998).  
703 The distribution of initial movement directions of indirect avoids overlapped with the initial  
704 directions of correct hits and skewed toward the direction of the bar, which supports previous  
705 work suggesting that movements are purposefully planned to optimize task success given  
706 uncertainty about the impending decision (Haith et al. 2015; Nashed et al. 2017; Wong and  
707 Haith 2017). Thus, even though the imposed time constraints still allow for sequential stimulus  
708 identification, decision-making, and movement execution, participants often favored an  
709 alternative strategy in which both ventral and dorsal stream processes co-occur during  
710 preparation and execution (Haith et al. 2016; Orban de Xivry et al. 2017).

711 What determines the magnitude of the bias towards simultaneous processing in the  
712 ventral and dorsal streams during decision-making? One likely driving factor is the subjective  
713 urgency of the upcoming response. Saccadic reaction times were faster in Decision blocks,  
714 reflecting a greater perceptual urgency to foveate on the peripheral object to allow more time

715 to identify its shape (Montagnini and Chelazzi 2005; Trottier and Pratt 2005). The increased  
716 urgency to initiate a saccade was associated with reduced positional accuracy of initial gaze  
717 and may have contributed to a dissociation between saccadic and hand RTs during Decision  
718 blocks. This trade-off emphasizes the dual role of the oculomotor system in decision formation  
719 and motor control (Fooker and Spering 2019; Joo et al. 2016), in which the use of eye  
720 movements for perceptual decision-making could interfere with its role in facilitating  
721 sensorimotor transformations for accurate limb movement.

722 The perceived urgency during task performance depended on the complexity of the  
723 motor response (Thura and Cisek 2016). Interceptions had lower accuracy than reaches  
724 during decision-making, largely due to participants incorrectly hitting a higher proportion of  
725 moving ellipses. In addition, the proportion of indirect avoids was higher for interception,  
726 indicating a stronger bias toward initiating a hit movement prior to making a perceptual  
727 decision about object shape. A higher proportion of indirect avoids was associated with shorter  
728 RTs, which indicates that the shorter RTs during interceptions in Decision blocks were likely  
729 due to a greater dependency on online decision-making and motor control (Brenner and  
730 Smeets 2018). Notably, the higher incorrect hit rate during interception was associated with the  
731 inability to adjust initial movement trajectories that account for decisional demands but was  
732 otherwise unrelated to motor performance (see Fig. 4). This suggests that the motor system,  
733 involving the dorsal stream, may initiate a control policy that can flexibly incorporate prolonged  
734 processing of sensory information in the ventral stream for online movement corrections. Our  
735 study does not address how the dorsal stream receives ventral stream information about  
736 object shape, but recent work has identified pathways between the two streams that could  
737 facilitate direct communication during ongoing sensorimotor control (Budisavljevic et al. 2018;  
738 Hutchison and Gallivan 2018; Takemura et al. 2016).

739

740 *Modulation of smooth pursuit gains during perceptual decision-making implicate the frontal eye*  
741 *fields in online interactions between the two visual streams*

742 Smooth pursuit gains have been conventionally defined as the ratio of target and gaze  
743 velocity in angular coordinates in head-fixed conditions. The first 100 ms of the smooth pursuit  
744 movement is referred to as the open-loop phase (Barnes 2008; Tychsen and Lisberger 1986).  
745 This is followed by the onset of closed-loop pursuit, which is mainly controlled by a negative

746 feedback loop to ensure that the eye velocity closely matches the target velocity. We  
747 compared both open-loop and closed-loop gains for the Interception blocks for the No-Decision  
748 and Decision conditions. As expected, our results show no differences in open-loop gains  
749 between the two conditions (see Fig. 8).

750 We are aware of only one study in which investigators studied how object recognition is  
751 affected during pursuit eye movements. Schütz and colleagues (Schütz et al. 2009)  
752 superimposed an English alphabet letter on a gray noisy patch and either moved it across the  
753 workspace at a fixed speed of 10.6°/sec (pursuit condition) or kept it stationary (fixation  
754 condition). At the end of each trial, participants were instructed to select a letter from a pool of  
755 20 letters to indicate which letter appeared on the patch. They showed that on average  
756 participants identified fewer targets correctly during the pursuit condition than the fixation  
757 condition, suggesting an impaired ability to recognize letters during pursuit eye movements.  
758 Though letter perception primarily involves Wernicke's area in the superior temporal gyrus,  
759 there are neural areas in the ventral visual stream that are involved in letter recognition. This  
760 suggests that recognition of object shapes should be harder while intercepting moving objects  
761 in Decision blocks.

762 In contrast to the slow speed of 10.6°/sec used by Schütz and colleagues, the objects in  
763 our experiment moved at approximately 80-90°/sec. This speed approaches the limit of smooth  
764 pursuit in humans (Meyer et al. 1985) and we expected that participants would not only have  
765 trouble in pursuing objects at high speeds, but that it would also compromise their ability to  
766 recognize objects. We found that participants increased the closed-loop gain of the pursuit to  
767 foveate the objects during the Decision condition. This result suggests that the visual  
768 perceptual decision-making network, that includes the ventral visual stream, dorsolateral  
769 prefrontal regions and frontal eye fields (Heekeren et al. 2004; Heekeren et al. 2008;  
770 Sakagami and Pan 2007), may provide either a predictive or urgency signal to the smooth  
771 pursuit system to increase the gain and minimize the retinal error between the target and the  
772 gaze. Indeed, stimulation and lesion studies have implicated the frontal eye fields with the  
773 modulation of smooth pursuit gain during object tracking (Gagnon et al. 2006; Keating 1991;  
774 Morrow and Sharpe 1995; Shi et al. 1998). Furthermore, anatomical tracer studies in primates  
775 have shown that the dorsal and ventral processing streams converge in the lateral frontal eye  
776 fields (Schall et al. 1995). Taken together with our data, this suggests that in tasks where

777 perceptual decision-making is necessary during pursuit eye movements, the frontal eye fields  
778 may modulate pursuit gains to meet task demands.

779

### 780 *Conclusions*

781 In this study, we introduced a visuomotor decision-making task in which a successful  
782 reaching or interception movement depended on visual processing for perception and action in  
783 the ventral and dorsal streams. We found lower accuracy and hand RTs for interception  
784 movements relative to reaching movements, effects that were amplified when a decision about  
785 object shape was required for accurate movement specification. During decision-making,  
786 participants had faster saccadic RTs and adopted online arm movement strategies that  
787 incorporated an evolving decision about object shape. Participants exhibited higher smooth  
788 pursuit gains to compensate for initial eye movements focused on the perceptual decision.  
789 These results suggest that the extent of simultaneous ventral-dorsal stream interactions during  
790 ongoing movement depends on the perceived urgency to act, which is greater when  
791 intercepting a moving target.



792 **References**

- 793 **Ales JM, Appelbaum LG, Cottureau BR, and Norcia AM.** The time course of shape discrimination in the  
794 human brain. *NeuroImage* 67: 77-88, 2013.
- 795 **Andersen RA, and Buneo CA.** Intentional maps in posterior parietal cortex. *Annual Review of*  
796 *Neuroscience* 25: 189-220, 2002.
- 797 **Andersen RA, Essick GK, and Siegel RM.** Encoding of spatial location by posterior parietal neurons.  
798 *Science* 230: 456-458, 1985.
- 799 **Archambault PS, Ferrari-Toniolo S, Caminiti R, and Battaglia-Mayer A.** Visually-guided correction of  
800 hand reaching movements: The neurophysiological bases in the cerebral cortex. *Vision Research* 110,  
801 Part B: 244-256, 2015.
- 802 **Barnes GR.** Cognitive processes involved in smooth pursuit eye movements. *Brain and Cognition* 68:  
803 309-326, 2008.
- 804 **Bernier P-M, and Grafton ST.** Human posterior parietal cortex flexibly determines reference frames for  
805 reaching based on sensory context. *Neuron* 68: 776-788, 2010.
- 806 **Beurze SM, Pelt SV, and Medendorp WP.** Behavioral reference frames for planning human reaching  
807 movements. *Journal of Neurophysiology* 96: 352-362, 2006.
- 808 **Beurze SM, Toni I, Pisella L, and Medendorp WP.** Reference frames for reach planning in human  
809 parietofrontal cortex. *Journal of Neurophysiology* 104: 1736-1745, 2010.
- 810 **Biguer B, Jeannerod M, and Prablanc C.** The coordination of eye, head, and arm movements during  
811 reaching at a single visual target. *Experimental Brain Research* 46: 301-304, 1982.
- 812 **Boussaoud D, and Bremmer F.** Gaze effects in the cerebral cortex: reference frames for space coding  
813 and action. *Experimental Brain Research* 128: 170-180, 1999.
- 814 **Brenner E, and Smeets JB.** Continuous visual control of interception. *Human Movement Science* 30:  
815 475-494, 2011.
- 816 **Brenner E, and Smeets JBJ.** Continuously updating one's predictions underlies successful interception.  
817 *Journal of Neurophysiology* 120: 3257-3274, 2018.
- 818 **Brenner E, Smeets JBJ, and van den Berg AV.** Smooth eye movements and spatial localisation. *Vision*  
819 *Research* 41: 2253-2259, 2001.

- 820 **Brostek L, Eggert T, and Glasauer S.** Gain control in predictive smooth pursuit eye movements:  
821 Evidence for an acceleration-based predictive mechanism. *eNeuro* 4: 2017.
- 822 **Budisavljevic S, Dell'Acqua F, and Castiello U.** Cross-talk connections underlying dorsal and ventral  
823 stream integration during hand actions. *Cortex* 103: 224-239, 2018.
- 824 **Burk D, Ingram JN, Franklin DW, Shadlen MN, and Wolpert DM.** Motor effort alters changes of mind  
825 in sensorimotor decision making. *PLoS One* 9: e92681, 2014.
- 826 **Caminiti R, Ferraina S, and Mayer AB.** Visuomotor transformations: early cortical mechanisms of  
827 reaching. *Current Opinion in Neurobiology* 8: 753-761, 1998.
- 828 **Cesqui B, d'Avella A, Portone A, and Lacquaniti F.** Catching a ball at the right time and place: Individual  
829 factors matter. *PLoS One* 7: e31770, 2012.
- 830 **Churchland AK, and Lisberger SG.** Gain control in human smooth-pursuit eye movements. *Journal of*  
831 *Neurophysiology* 87: 2936-2945, 2002.
- 832 **Cisek P, and Kalaska JF.** Neural mechanisms for interacting with a world full of action choices. *Annual*  
833 *Review of Neuroscience* 33: 269-298, 2010.
- 834 **Cisek P, Puskas GA, and El-Murr S.** Decisions in changing conditions: the urgency-gating model. *Journal*  
835 *of Neuroscience* 29: 11560-11571, 2009.
- 836 **Clower DM, Hoffman JM, Votaw JR, Faber TL, Woods RP, and Alexander GE.** Role of posterior parietal  
837 cortex in the recalibration of visually guided reaching. *Nature* 383: 618, 1996.
- 838 **Colby C, and Goldberg M.** The updating of the representation of visual space in parietal cortex by  
839 intended eye movements. *Science* 255: 90-92, 1992.
- 840 **Culham JC, Cavina-Pratesi C, and Singhal A.** The role of parietal cortex in visuomotor control: what  
841 have we learned from neuroimaging? *Neuropsychologia* 44: 2668-2684, 2006.
- 842 **Davare M, Andres M, Clerget E, Thonnard JL, and Olivier E.** Temporal dissociation between hand  
843 shaping and grip force scaling in the anterior intraparietal area. *J Neurosci* 27: 3974-3980, 2007.
- 844 **Dekleva BM, Kording KP, and Miller LE.** Single reach plans in dorsal premotor cortex during a two-  
845 target task. *Nature Communications* 9: 3556, 2018.
- 846 **Delorme A, Richard G, and Fabre-Thorpe M.** Ultra-rapid categorisation of natural scenes does not rely  
847 on colour cues: a study in monkeys and humans. *Vision Research* 40: 2187-2200, 2000.

- 848 **Desmurget M, and Grafton S.** Forward modeling allows feedback control for fast reaching movements.  
849 *Trends in Cognitive Sciences* 4: 423-431, 2000.
- 850 **Dessing JC, Crawford JD, and Medendorp WP.** Spatial updating across saccades during manual  
851 interception. *Journal of Vision* 11: 4-4, 2011.
- 852 **Dimitriou M, Wolpert DM, and Franklin DW.** The temporal evolution of feedback gains rapidly update  
853 to task demands. *Journal of Neuroscience* 33: 10898-10909, 2013.
- 854 **Donders FC.** On the speed of mental processes. *Acta Psychologica* 30: 412-431, 1969.
- 855 **Doniger GM, Foxe JJ, Murray MM, Higgins BA, Snodgrass JG, Schroeder CE, and Javitt DC.** Activation  
856 timecourse of ventral visual stream object-recognition areas: high density electrical mapping of  
857 perceptual closure processes. *Journal of Cognitive Neuroscience* 12: 615-621, 2000.
- 858 **Fitts PM.** The information capacity of the human motor system in controlling the amplitude of  
859 movement. *Journal of Experimental Psychology* 47: 381-391, 1954.
- 860 **Fooker J, and Spering M.** Decoding go/no-go decisions from eye movements. *J Vis* 19: 5, 2019.
- 861 **Gagnon D, Paus T, Grosbras M-H, Pike GB, and O'Driscoll GA.** Transcranial magnetic stimulation of  
862 frontal oculomotor regions during smooth pursuit. *Journal of Neuroscience* 26: 458-466, 2006.
- 863 **Gallivan JP, Chapman CS, Wolpert DM, and Flanagan JR.** Decision-making in sensorimotor control.  
864 *Nature Reviews Neuroscience* 19: 519-534, 2018.
- 865 **Gallivan JP, Logan L, Wolpert DM, and Flanagan JR.** Parallel specification of competing sensorimotor  
866 control policies for alternative action options. *Nature Neuroscience* 19: 320-326, 2016.
- 867 **Goodale MA, and Milner AD.** Separate visual pathways for perception and action. *Trends in*  
868 *Neurosciences* 15: 20-25, 1992.
- 869 **Goodale MA, Pelisson D, and Prablanc C.** Large adjustments in visually guided reaching do not depend  
870 on vision of the hand or perception of target displacement. *Nature* 320: 748-750, 1986.
- 871 **Goodale MA, and Westwood DA.** An evolving view of duplex vision: separate but interacting cortical  
872 pathways for perception and action. *Curr Opin Neurobiol* 14: 203-211, 2004.
- 873 **Grafton S, Fagg A, and Arbib M.** Dorsal premotor cortex and conditional movement selection: A PET  
874 functional mapping study. *Journal of Neurophysiology* 79: 1092-1097, 1998.
- 875 **Green DM, and Swets JA.** *Signal detection theory and psychophysics*. Wiley New York, 1966.

- 876 **Grill-Spector K, Kourtzi Z, and Kanwisher N.** The lateral occipital complex and its role in object  
877 recognition. *Vision Research* 41: 1409-1422, 2001.
- 878 **Haith AM, Huberdeau DM, and Krakauer JW.** Hedging your bets: Intermediate movements as optimal  
879 behavior in the context of an incomplete decision. *PLoS Computational Biology* 11: e1004171, 2015.
- 880 **Haith AM, Pakpoor J, and Krakauer JW.** Independence of movement preparation and movement  
881 initiation. *Journal of Neuroscience* 36: 3007-3015, 2016.
- 882 **Hecht D, Reiner M, and Karni A.** Multisensory enhancement: gains in choice and in simple response  
883 times. *Experimental Brain Research* 189: 133, 2008.
- 884 **Heekeren HR, Marrett S, Bandettini PA, and Ungerleider LG.** A general mechanism for perceptual  
885 decision-making in the human brain. *Nature* 431: 859-862, 2004.
- 886 **Heekeren HR, Marrett S, and Ungerleider LG.** The neural systems that mediate human perceptual  
887 decision making. *Nature Reviews Neuroscience* 9: 467-479, 2008.
- 888 **Hegd  J.** Time course of visual perception: coarse-to-fine processing and beyond. *Progress in*  
889 *Neurobiology* 84: 405-439, 2008.
- 890 **Holm S.** A simple sequentially rejective multiple test procedure. *Scandinavian Journal of Statistics* 6:  
891 65-70, 1979.
- 892 **Honda H.** The extraretinal signal from the pursuit-eye-movement system: Its role in the perceptual and  
893 the egocentric localization systems. *Perception & Psychophysics* 48: 509-515, 1990.
- 894 **Hutchison RM, and Gallivan JP.** Functional coupling between frontoparietal and occipitotemporal  
895 pathways during action and perception. *Cortex* 98: 8-27, 2018.
- 896 **Jax SA, and Rosenbaum DA.** Hand path priming in manual obstacle avoidance: rapid decay of dorsal  
897 stream information. *Neuropsychologia* 47: 1573-1577, 2009.
- 898 **Joo SJ, Katz LN, and Huk AC.** Decision-related perturbations of decision-irrelevant eye movements.  
899 *Proc Natl Acad Sci U S A* 113: 1925-1930, 2016.
- 900 **Kalaska JF, and Crammond DJ.** Deciding not to GO: neuronal correlates of response selection in a  
901 GO/NOGO task in primate premotor and parietal cortex. *Cerebral Cortex* 5: 410-428, 1995.
- 902 **Keating E.** Frontal eye field lesions impair predictive and visually-guided pursuit eye movements.  
903 *Experimental Brain Research* 86: 311-323, 1991.

- 904 **Konen CS, and Kastner S.** Two hierarchically organized neural systems for object information in human  
905 visual cortex. *Nature Neuroscience* 11: 224-231, 2008.
- 906 **Lacquaniti F, Carrozzo M, and Borghese NA.** Time-varying mechanical behavior of multijointed arm in  
907 man. *Journal of Neurophysiology* 69: 1443-1464, 1993.
- 908 **Lara AH, Elsayed GF, Zimnik AJ, Cunningham JP, and Churchland MM.** Conservation of preparatory  
909 neural events in monkey motor cortex regardless of how movement is initiated. *Elife* 7: 2018.
- 910 **Lehky SR, and Sereno AB.** Comparison of shape encoding in primate dorsal and ventral visual  
911 pathways. *Journal of Neurophysiology* 97: 307-319, 2007.
- 912 **Lehky SR, and Tanaka K.** Neural representation for object recognition in inferotemporal cortex. *Current*  
913 *Opinion in Neurobiology* 37: 23-35, 2016.
- 914 **Meyer CH, Lasker AG, and Robinson DA.** The upper limit of human smooth pursuit velocity. *Vision*  
915 *Research* 25: 561-563, 1985.
- 916 **Mishkin M, Ungerleider LG, and Macko KA.** Object vision and spatial vision: two cortical pathways.  
917 *Trends in Neurosciences* 6: 414-417, 1983.
- 918 **Montagnini A, and Chelazzi L.** The urgency to look: prompt saccades to the benefit of perception.  
919 *Vision Res* 45: 3391-3401, 2005.
- 920 **Morrow MJ, and Sharpe JA.** Deficits of smooth-pursuit eye movement after unilateral frontal lobe  
921 lesions. *Annals of Neurology* 37: 443-451, 1995.
- 922 **Munoz DP, and Corneil BD.** Evidence for interactions between target selection and visual fixation for  
923 saccade generation in humans. *Experimental Brain Research* 103: 168-173, 1995.
- 924 **Munro H, Plumb MS, Wilson AD, Williams JH, and Mon-Williams M.** The effect of distance on reaction  
925 time in aiming movements. *Exp Brain Res* 183: 249-257, 2007.
- 926 **Nashed JY, Diamond JS, Gallivan JP, Wolpert DM, and Flanagan JR.** Grip force when reaching with  
927 target uncertainty provides evidence for motor optimization over averaging. *Sci Rep* 7: 11703, 2017.
- 928 **Orban de Xivry JJ, Legrain V, and Lefevre P.** Overlap of movement planning and movement execution  
929 reduces reaction time. *J Neurophysiol* 117: 117-122, 2017.
- 930 **Péllisson D, Prablanc C, Goodale MA, and Jeannerod M.** Visual control of reaching movements without  
931 vision of the limb. II. Evidence of fast unconscious processes correcting the trajectory of the hand to  
932 the final position of a double-step stimulus. *Experimental Brain Research* 62: 303-311, 1986.

- 933 **Perfiliev S, Isa T, Johnels B, Steg G, and Wessberg J.** Reflexive limb selection and control of reach  
934 direction to moving targets in cats, monkeys, and humans. *Journal of Neurophysiology* 104: 2423-2432,  
935 2010.
- 936 **Pesaran B, Nelson MJ, and Andersen RA.** Dorsal premotor neurons encode the relative position of the  
937 hand, eye, and goal during reach planning. *Neuron* 51: 125-134, 2006.
- 938 **Pisella L, Grea H, Tilikete C, Vighetto A, Desmurget M, Rode G, Boisson D, and Rossetti Y.** An  
939 'automatic pilot' for the hand in human posterior parietal cortex: toward reinterpreting optic ataxia.  
940 *Nature Neuroscience* 3: 729-736, 2000.
- 941 **Prablanc C, Desmurget M, and Gréa H.** Neural control of on-line guidance of hand reaching  
942 movements. In: *Progress in Brain Research* Elsevier, 2003, p. 155-170.
- 943 **Prablanc C, Echallier J, Komilis E, and Jeannerod M.** Optimal response of eye and hand motor systems  
944 in pointing at a visual target. *Biological Cybernetics* 35: 113-124, 1979.
- 945 **Prablanc C, Pélisson D, and Goodale M.** Visual control of reaching movements without vision of the  
946 limb. I. Role of retinal feedback of target position in guiding the hand. *Experimental Brain Research* 62:  
947 293-302, 1986.
- 948 **Reichenbach A.** The detection continuum for motor control comprises preparation and adjustments.  
949 *Motor Control* 20: 177-181, 2016.
- 950 **Resulaj A, Kiani R, Wolpert DM, and Shadlen MN.** Changes of mind in decision-making. *Nature* 461:  
951 263-266, 2009.
- 952 **Rizzolatti G, Fogassi L, and Gallese V.** Motor and cognitive functions of the ventral premotor cortex.  
953 *Current Opinion in Neurobiology* 12: 149-154, 2002.
- 954 **Rizzolatti G, and Matelli M.** Two different streams form the dorsal visual system: anatomy and  
955 functions. *Experimental Brain Research* 153: 146-157, 2003.
- 956 **Rosenbaum DA, Cohen RG, Jax SA, Weiss DJ, and Van Der Wel R.** The problem of serial order in  
957 behavior: Lashley's legacy. *Human Movement Science* 26: 525-554, 2007.
- 958 **Rushworth M, Johansen-Berg H, Göbel SM, and Devlin J.** The left parietal and premotor cortices:  
959 motor attention and selection. *NeuroImage* 20: S89-S100, 2003.
- 960 **Sakagami M, and Pan X.** Functional role of the ventrolateral prefrontal cortex in decision making.  
961 *Current Opinion in Neurobiology* 17: 228-233, 2007.

- 962 **Saunders JA, and Knill DC.** Humans use continuous visual feedback from the hand to control fast  
963 reaching movements. *Experimental Brain Research* 152: 341-352, 2003.
- 964 **Schall JD, Morel A, King DJ, and Bullier J.** Topography of visual cortex connections with frontal eye  
965 field in macaque: convergence and segregation of processing streams. *Journal of Neuroscience* 15:  
966 4464-4487, 1995.
- 967 **Schlag J, and Schlag-Rey M.** Through the eye, slowly; Delays and localization errors in the visual  
968 system. *Nature Reviews Neuroscience* 3: 191-200, 2002.
- 969 **Schütz AC, Braun DI, and Gegenfurtner KR.** Object recognition during foveating eye movements. *Vision*  
970 *Research* 49: 2241-2253, 2009.
- 971 **Schwartz EL, Desimone R, Albright TD, and Gross CG.** Shape recognition and inferior temporal  
972 neurons. *Proceedings of the National Academy of Sciences* 80: 5776-5778, 1983.
- 973 **Selen LP, Shadlen MN, and Wolpert DM.** Deliberation in the motor system: reflex gains track evolving  
974 evidence leading to a decision. *J Neurosci* 32: 2276-2286, 2012.
- 975 **Sereno AB, and Maunsell JH.** Shape selectivity in primate lateral intraparietal cortex. *Nature* 395: 500-  
976 503, 1998.
- 977 **Shadmehr R, and Wise SP.** *The Computational Neurobiology of Reaching and Pointing: A Foundation*  
978 *for Motor Learning.* The MIT press, 2005.
- 979 **Shi D, Friedman HR, and Bruce CJ.** Deficits in smooth-pursuit eye movements after muscimol  
980 inactivation within the primate's frontal eye field. *Journal of Neurophysiology* 80: 458-464, 1998.
- 981 **Singh T, Fridriksson J, Perry C, Tryon SC, Ross A, Fritz S, and Herter TM.** A novel computational model  
982 to probe visual search deficits during motor performance. *Journal of Neurophysiology* 117: 79-92,  
983 2017.
- 984 **Singh T, Perry CM, and Herter TM.** A geometric method for computing ocular kinematics and  
985 classifying gaze events using monocular remote eye tracking in a robotic environment. *Journal of*  
986 *NeuroEngineering and Rehabilitation* 13: 10, 2016.
- 987 **Smeets JB, Oostwoud WL, and Brenner E.** Movement adjustments have short latencies because there  
988 is no need to detect anything. *Motor Control* 20: 137-148, 2016.
- 989 **Song J-H, and Nakayama K.** Target selection in visual search as revealed by movement trajectories.  
990 *Vision Research* 48: 853-861, 2008.

991 **Spering M, Kerzel D, Braun DI, Hawken MJ, and Gegenfurtner KR.** Effects of contrast on smooth  
992 pursuit eye movements. *Journal of Vision* 5: 6-6, 2005.

993 **Sternberg S.** The discovery of processing stages: Extensions of Donders' method. *Acta Psychologica* 30:  
994 276-315, 1969.

995 **Stevenson SA, Elsley JK, and Corneil BD.** A "gap effect" on stop signal reaction times in a human  
996 saccadic countermanding task. *Journal of Neurophysiology* 101: 580-590, 2009.

997 **Takemura H, Rokem A, Winawer J, Yeatman JD, Wandell BA, and Pestilli F.** A Major Human White  
998 Matter Pathway Between Dorsal and Ventral Visual Cortex. *Cereb Cortex* 26: 2205-2214, 2016.

999 **Thorpe SJ, and Fabre-Thorpe M.** Seeking categories in the brain. *Science* 291: 260-263, 2001.

1000 **Thura D, and Cisek P.** Modulation of premotor and primary motor cortical activity during volitional  
1001 adjustments of speed-accuracy trade-offs. *Journal of Neuroscience* 36: 938-956, 2016.

1002 **Tombini M, Zappasodi F, Zollo L, Pellegrino G, Cavallo G, Tecchio F, Guglielmelli E, and Rossini PM.**  
1003 Brain activity preceding a 2D manual catching task. *NeuroImage* 47: 1735-1746, 2009.

1004 **Trottier L, and Pratt J.** Visual processing of targets can reduce saccadic latencies. *Vision Research* 45:  
1005 1349-1354, 2005.

1006 **Tychsen L, and Lisberger SG.** Visual motion processing for the initiation of smooth-pursuit eye  
1007 movements in humans. *Journal of Neurophysiology* 56: 953-968, 1986.

1008 **Ulrich R, Mattes S, and Miller J.** Donders's assumption of pure insertion: an evaluation on the basis of  
1009 response dynamics. *Acta Psychologica* 102: 43-76, 1999.

1010 **van den Berg R, Anandalingam K, Zylberberg A, Kiani R, Shadlen MN, and Wolpert DM.** A common  
1011 mechanism underlies changes of mind about decisions and confidence. *Elife* 5: e12192, 2016.

1012 **Veerman MM, Brenner E, and Smeets JB.** The latency for correcting a movement depends on the  
1013 visual attribute that defines the target. *Exp Brain Res* 187: 219-228, 2008.

1014 **Wong AL, and Haith AM.** Motor planning flexibly optimizes performance under uncertainty about task  
1015 goals. *Nature Communications* 8: 14624, 2017.

1016 **Zago M, McIntyre J, Senot P, and Lacquaniti F.** Visuo-motor coordination and internal models for  
1017 object interception. *Experimental Brain Research* 192: 571-604, 2009.

1018
